# Supplementary material for: Genome wide comparison of Ethiopian Leishmania donovani strains reveals differences potentially related to parasite survival
Source: PLoS Genet. 2018 Jan 9;14(1):e1007133. doi: 10.1371/journal.pgen.1007133 (PMC5777657; doi:10.1371/journal.pgen.1007133)
Supplement: S8 Table — (XLSX) [file pgen.1007133.s012.xlsx]

## Sheet: Sheet1
Table S8. Copy number variation of genes in northern and southern Ethiopian Leishmania donovani
(1) Gene ID
(2) gene copy number variation
chromosome	start	end	ID(1)	Gene name	CNV(2)	Sample Name			SE	NE
9	447763	448602	LDBPK_091130	Eukaryotic translation initiation factor 2 subunit	4	AM421		mean	2.47766	3.38682
9	452959	453159	LDBPK_091140	Translation initiation factor EIF-2B gamma subunit	4	AM421		SD	1.08915	1.13681
9	454006	454773	LDBPK_091160	Putative uncharacterized protein	4	AM421		N	582	1184
10	162754	163668	LDBPK_100390	Folate/biopterin transporter	1	AM421
10	170745	171935	LDBPK_100400	Folate/biopterin transporter	1	AM421
10	178404	179465	LDBPK_100410	Folate/biopterin transporter	1	AM421
11	501882	502019	LDBPK_111220	ABC transporter-like protein (Fragment)	1	AM421
11	505709	509374	LDBPK_111230	ATP-binding cassette protein subfamily A	1	AM421
12	410501	411088	LDBPK_120667	Putative uncharacterized protein LDBPK_120667	1	AM421
14	250499	251383	LDBPK_140700	Fatty acid elongase	3	AM421
19	572975	574054	LDBPK_191340	Glycerol uptake protein	3	AM421
19	572975	574051	LDBPK_191350	Glycerol uptake protein	3	AM421
22	666638	666850	LDBPK_221550	Putative uncharacterized protein	1	AM421
23	91285	95325	LDBPK_230290	ABC-thiol transporter (Fragment)	1	AM421
23	96936	98192	LDBPK_230300	Argininosuccinate synthase	1	AM421
23	508143	508202	LDBPK_231240	Hydrophilic acylated surface protein a (Fragment)	3	AM421
26	607605	607934	LDBPK_261670	Fatty acid desaturase	3	AM421
26	610498	611574	LDBPK_261680	Fatty acid desaturase	3	AM421
26	612686	613276	LDBPK_261690	Cytochrome c oxidase subunit V	3	AM421
27	798359	799840	LDBPK_271940	D-lactate dehydrogenase-like protein	1	AM421
27	803591	804793	LDBPK_271950	Branched-chain amino acid aminotransferase	1	AM421
28	756654	756995	LDBPK_282040	Putative uncharacterized protein	3	AM421
28	760309	761703	LDBPK_282050	Zinc transporter	3	AM421
30	1181585	1182820	LDBPK_303210	Putative uncharacterized protein	4	AM421
30	1185565	1185990	LDBPK_303220	Putative uncharacterized protein	4	AM421
30	1188152	1189456	LDBPK_303230	3-hydroxy-3-methylglutaryl-CoA reductase	4	AM421
31	670326	670781	LDBPK_311470	Putative uncharacterized protein	1	AM421
31	771427	773862	LDBPK_311630	Putative uncharacterized protein	3	AM421
31	774133	774948	LDBPK_311640	Diphthine synthase-like protein	3	AM421
31	775217	775756	LDBPK_311650	Putative uncharacterized protein	3	AM421
31	778270	778329	LDBPK_311660	Putative 3-ketoacyl-coa thiolase-like protein	3	AM421
33	1380390	1380647	LDBPK_333230	Putative uncharacterized protein (Fragment)	1	AM421
34	1155486	1155740	LDBPK_342650	Amastin-like surface protein	1	AM421
34	1160118	1160435	LDBPK_342660	Amastin-like surface protein	1	AM421
36	1571715	1572758	LDBPK_364270	Phosphoglycerate mutase family member 5	1	AM421
36	2526888	2527169	LDBPK_366740	Tartrate-sensitive acid phosphatase acp-3.2	1	AM421
36	2528652	2530061	LDBPK_366750	Putative uncharacterized protein	1	AM421
36	2531707	2532783	LDBPK_366760	Mitogen activated protein kinase homologue	1	AM421
4	51206	52510	LDBPK_040150	Putative uncharacterized protein	3	AM422
4	53006	54583	LDBPK_040160	Putative uncharacterized protein	3	AM422
4	57483	58529	LDBPK_040170	Surface antigen-like protein (Fragment)	3	AM422
9	447763	448602	LDBPK_091130	Eukaryotic translation initiation factor 2 subunit	4	AM422
9	452959	453159	LDBPK_091140	Translation initiation factor EIF-2B gamma subunit	4	AM422
9	454006	454773	LDBPK_091160	Putative uncharacterized protein	4	AM422
10	162754	163668	LDBPK_100390	Folate/biopterin transporter	1	AM422
10	170745	171935	LDBPK_100400	Folate/biopterin transporter	1	AM422
10	178404	179465	LDBPK_100410	Folate/biopterin transporter	1	AM422
11	501882	502019	LDBPK_111220	ABC transporter-like protein (Fragment)	1	AM422
11	505709	509374	LDBPK_111230	ATP-binding cassette protein subfamily A	1	AM422
16	389204	390091	LDBPK_161060	Putative uncharacterized protein (Fragment)	4	AM422
16	391228	391707	LDBPK_161070	Putative uncharacterized protein (Fragment)	4	AM422
17	57178	59232	LDBPK_170140	Receptor-type adenylate cyclase b (Fragment)	3	AM422
17	61864	62145	LDBPK_170150	Receptor-type adenylate cyclase b	3	AM422
23	435473	436495	LDBPK_231050	Quinone oxidoreductase-like protein	4	AM422
27	318748	319674	LDBPK_270780	Putative uncharacterized protein	3	AM422
28	525151	526179	LDBPK_281500	Putative uncharacterized protein	3	AM422
30	498149	498673	LDBPK_301480	Ama1 protein	3	AM422
30	498977	499222	LDBPK_301490	Ama1 protein	3	AM422
31	857438	857743	LDBPK_311840	Acetylornithine deacetylase-like protein	3	AM422
31	865260	866147	LDBPK_311850	Amino acid permease (Fragment)	3	AM422
34	728956	729774	LDBPK_341700	Amastin-like surface protein	1	AM422
34	1128060	1129343	LDBPK_342580	Methyltransferase-like protein	4	AM422
34	1130343	1131248	LDBPK_342590	Putative uncharacterized protein	4	AM422
36	2531707	2532783	LDBPK_366760	Mitogen activated protein kinase homologue	1	AM422
4	51206	52510	LDBPK_040150	Putative uncharacterized protein	3	AM546
4	53006	54583	LDBPK_040160	Putative uncharacterized protein	3	AM546
4	57483	58529	LDBPK_040170	Surface antigen-like protein (Fragment)	3	AM546
10	170745	171935	LDBPK_100400	Folate/biopterin transporter	1	AM546
10	178404	179465	LDBPK_100410	Folate/biopterin transporter	1	AM546
11	501882	502019	LDBPK_111220	ABC transporter-like protein (Fragment)	1	AM546
11	505709	509374	LDBPK_111230	ATP-binding cassette protein subfamily A	1	AM546
12	410501	411088	LDBPK_120667	Putative uncharacterized protein LDBPK_120667	1	AM546
19	572975	574054	LDBPK_191340	Glycerol uptake protein	3	AM546
19	572975	574051	LDBPK_191350	Glycerol uptake protein	3	AM546
22	666638	666850	LDBPK_221550	Putative uncharacterized protein	1	AM546
23	435473	436495	LDBPK_231050	Quinone oxidoreductase-like protein	3	AM546
23	508143	508202	LDBPK_231240	Hydrophilic acylated surface protein a (Fragment)	3	AM546
27	318748	319674	LDBPK_270780	Putative uncharacterized protein	3	AM546
27	798359	799840	LDBPK_271940	D-lactate dehydrogenase-like protein	1	AM546
27	803591	804793	LDBPK_271950	Branched-chain amino acid aminotransferase	1	AM546
28	756654	756995	LDBPK_282040	Putative uncharacterized protein	3	AM546
28	760309	761703	LDBPK_282050	Zinc transporter	3	AM546
30	572069	575023	LDBPK_301630	Ferric reductase	3	AM546
30	1181585	1182820	LDBPK_303210	Putative uncharacterized protein	4	AM546
30	1185565	1185990	LDBPK_303220	Putative uncharacterized protein	4	AM546
30	1188152	1189456	LDBPK_303230	3-hydroxy-3-methylglutaryl-CoA reductase	4	AM546
31	670326	670781	LDBPK_311470	Putative uncharacterized protein	1	AM546
31	771427	773862	LDBPK_311630	Putative uncharacterized protein	3	AM546
31	774133	774948	LDBPK_311640	Diphthine synthase-like protein	3	AM546
31	775217	775756	LDBPK_311650	Putative uncharacterized protein	3	AM546
31	778270	778329	LDBPK_311660	Putative 3-ketoacyl-coa thiolase-like protein	3	AM546
31	930420	932993	LDBPK_311920	Mannosyltransferase-like protein	3	AM546
31	937932	938318	LDBPK_311930	Ubiquitin-fusion protein	3	AM546
32	1446816	1447142	LDBPK_323810	3-hydroxyisobutyryl-coenzyme a hydrolase-like protein	1	AM546
32	1450978	1452027	LDBPK_323820	3-hydroxyisobutyryl-coenzyme a hydrolase-like protein	1	AM546
32	1453479	1454594	LDBPK_323830	Enoyl-CoA hydratase/isomerase family protein	1	AM546
34	1155486	1155740	LDBPK_342650	Amastin-like surface protein	1	AM546
34	1160118	1160435	LDBPK_342660	Amastin-like surface protein	1	AM546
36	1571715	1572758	LDBPK_364270	Phosphoglycerate mutase family member 5	1	AM546
36	2526888	2527169	LDBPK_366740	Tartrate-sensitive acid phosphatase acp-3.2	1	AM546
36	2528652	2530061	LDBPK_366750	Putative uncharacterized protein	1	AM546
36	2531707	2532783	LDBPK_366760	Mitogen activated protein kinase homologue	1	AM546
4	51206	52510	LDBPK_040150	Putative uncharacterized protein	3	AM548
4	53006	54583	LDBPK_040160	Putative uncharacterized protein	3	AM548
4	57483	58529	LDBPK_040170	Surface antigen-like protein (Fragment)	3	AM548
10	162754	163668	LDBPK_100390	Folate/biopterin transporter	1	AM548
10	170745	171935	LDBPK_100400	Folate/biopterin transporter	1	AM548
10	178404	179465	LDBPK_100410	Folate/biopterin transporter	1	AM548
12	410501	411088	LDBPK_120667	Putative uncharacterized protein LDBPK_120667	1	AM548
19	572975	574054	LDBPK_191340	Glycerol uptake protein	3	AM548
19	572975	574051	LDBPK_191350	Glycerol uptake protein	3	AM548
22	666638	666850	LDBPK_221550	Putative uncharacterized protein	1	AM548
23	91285	95325	LDBPK_230290	ABC-thiol transporter (Fragment)	1	AM548
23	96936	98192	LDBPK_230300	Argininosuccinate synthase	1	AM548
23	508143	508202	LDBPK_231240	Hydrophilic acylated surface protein a (Fragment)	3	AM548
27	798359	799840	LDBPK_271940	D-lactate dehydrogenase-like protein	1	AM548
27	803591	804793	LDBPK_271950	Branched-chain amino acid aminotransferase	1	AM548
28	756654	756995	LDBPK_282040	Putative uncharacterized protein	3	AM548
28	760309	761703	LDBPK_282050	Zinc transporter	3	AM548
29	715106	715465	LDBPK_291620	Putative uncharacterized protein (Fragment)	1	AM548
29	721206	721553	LDBPK_291630	Putative uncharacterized protein	1	AM548
30	572069	575023	LDBPK_301630	Ferric reductase	3	AM548
30	1181585	1182820	LDBPK_303210	Putative uncharacterized protein	4	AM548
30	1185565	1185990	LDBPK_303220	Putative uncharacterized protein	4	AM548
30	1188152	1189456	LDBPK_303230	3-hydroxy-3-methylglutaryl-CoA reductase	4	AM548
31	670326	670781	LDBPK_311470	Putative uncharacterized protein	1	AM548
31	771427	773862	LDBPK_311630	Putative uncharacterized protein	3	AM548
31	774133	774948	LDBPK_311640	Diphthine synthase-like protein	3	AM548
31	775217	775756	LDBPK_311650	Putative uncharacterized protein	3	AM548
31	778270	778329	LDBPK_311660	Putative 3-ketoacyl-coa thiolase-like protein	3	AM548
31	930420	932993	LDBPK_311920	Mannosyltransferase-like protein	3	AM548
31	937932	938318	LDBPK_311930	Ubiquitin-fusion protein	3	AM548
34	1155486	1155740	LDBPK_342650	Amastin-like surface protein	1	AM548
34	1160118	1160435	LDBPK_342660	Amastin-like surface protein	1	AM548
36	1571715	1572758	LDBPK_364270	Phosphoglycerate mutase family member 5	1	AM548
36	2526888	2527169	LDBPK_366740	Tartrate-sensitive acid phosphatase acp-3.2	1	AM548
36	2528652	2530061	LDBPK_366750	Putative uncharacterized protein	1	AM548
36	2531707	2532783	LDBPK_366760	Mitogen activated protein kinase homologue	1	AM548
4	57483	58529	LDBPK_040170	Surface antigen-like protein (Fragment)	3	AM551
4	60774	62483	LDBPK_040180	Surface antigen-like protein (Fragment)	3	AM551
4	63975	64523	LDBPK_040190	Surface antigen-like protein	3	AM551
10	156011	156517	LDBPK_100380	Folate/biopterin transporter	1	AM551
10	162754	163668	LDBPK_100390	Folate/biopterin transporter	1	AM551
10	170745	171935	LDBPK_100400	Folate/biopterin transporter	1	AM551
10	178404	179465	LDBPK_100410	Folate/biopterin transporter	1	AM551
11	501882	502019	LDBPK_111220	ABC transporter-like protein (Fragment)	1	AM551
11	505709	509374	LDBPK_111230	ATP-binding cassette protein subfamily A	1	AM551
16	370843	372216	LDBPK_161030	Putative uncharacterized protein (Fragment)	3	AM551
16	374017	374442	LDBPK_161030a	Putative uncharacterized protein	3	AM551
16	380132	380311	LDBPK_161040	Putative uncharacterized protein	3	AM551
16	384231	385391	LDBPK_161050	Putative uncharacterized protein (Fragment)	3	AM551
16	389204	390091	LDBPK_161060	Putative uncharacterized protein (Fragment)	3	AM551
16	391228	391707	LDBPK_161070	Putative uncharacterized protein (Fragment)	3	AM551
19	572975	574054	LDBPK_191340	Glycerol uptake protein	3	AM551
19	572975	574051	LDBPK_191350	Glycerol uptake protein	3	AM551
22	666638	666850	LDBPK_221550	Putative uncharacterized protein	1	AM551
23	435473	436495	LDBPK_231050	Quinone oxidoreductase-like protein	3	AM551
23	508143	508202	LDBPK_231240	Hydrophilic acylated surface protein a (Fragment)	3	AM551
27	798359	799840	LDBPK_271940	D-lactate dehydrogenase-like protein	1	AM551
27	803591	804793	LDBPK_271950	Branched-chain amino acid aminotransferase	1	AM551
28	756654	756995	LDBPK_282040	Putative uncharacterized protein	3	AM551
28	760309	761703	LDBPK_282050	Zinc transporter	3	AM551
30	1181585	1182820	LDBPK_303210	Putative uncharacterized protein	4	AM551
30	1185565	1185990	LDBPK_303220	Putative uncharacterized protein	4	AM551
30	1188152	1189456	LDBPK_303230	3-hydroxy-3-methylglutaryl-CoA reductase	4	AM551
31	522936	524792	LDBPK_311300	ATP-binding cassette protein subfamily C	3	AM551
31	670326	670781	LDBPK_311470	Putative uncharacterized protein	1	AM551
31	771427	773862	LDBPK_311630	Putative uncharacterized protein	3	AM551
31	774133	774948	LDBPK_311640	Diphthine synthase-like protein	3	AM551
31	775217	775756	LDBPK_311650	Putative uncharacterized protein	3	AM551
31	778270	778329	LDBPK_311660	Putative 3-ketoacyl-coa thiolase-like protein	3	AM551
33	1380390	1380647	LDBPK_333230	Putative uncharacterized protein (Fragment)	1	AM551
34	724932	725564	LDBPK_341690	Amastin-like surface protein	3	AM551
34	728956	729774	LDBPK_341700	Amastin-like surface protein	3	AM551
34	1155486	1155740	LDBPK_342650	Amastin-like surface protein	1	AM551
34	1160118	1160435	LDBPK_342660	Amastin-like surface protein	1	AM551
36	1571715	1572758	LDBPK_364270	Phosphoglycerate mutase family member 5	1	AM551
36	2526888	2527169	LDBPK_366740	Tartrate-sensitive acid phosphatase acp-3.2	1	AM551
36	2528652	2530061	LDBPK_366750	Putative uncharacterized protein	1	AM551
36	2531707	2532783	LDBPK_366760	Mitogen activated protein kinase homologue	1	AM551
4	51206	52510	LDBPK_040150	Putative uncharacterized protein	3	AM552
4	53006	54583	LDBPK_040160	Putative uncharacterized protein	3	AM552
4	57483	58529	LDBPK_040170	Surface antigen-like protein (Fragment)	3	AM552
10	162754	163668	LDBPK_100390	Folate/biopterin transporter	1	AM552
10	170745	171935	LDBPK_100400	Folate/biopterin transporter	1	AM552
10	178404	179465	LDBPK_100410	Folate/biopterin transporter	1	AM552
19	572975	574054	LDBPK_191340	Glycerol uptake protein	3	AM552
19	572975	574051	LDBPK_191350	Glycerol uptake protein	3	AM552
21	77020	78435	LDBPK_210300	Hexokinase	3	AM552
21	80721	81683	LDBPK_210310	Hexokinase	3	AM552
22	666638	666850	LDBPK_221550	Putative uncharacterized protein	1	AM552
23	91285	95325	LDBPK_230290	ABC-thiol transporter (Fragment)	1	AM552
23	96936	98192	LDBPK_230300	Argininosuccinate synthase	1	AM552
23	508143	508202	LDBPK_231240	Hydrophilic acylated surface protein a (Fragment)	3	AM552
27	798359	799840	LDBPK_271940	D-lactate dehydrogenase-like protein	1	AM552
27	803591	804793	LDBPK_271950	Branched-chain amino acid aminotransferase	1	AM552
28	756654	756995	LDBPK_282040	Putative uncharacterized protein	3	AM552
28	760309	761703	LDBPK_282050	Zinc transporter	3	AM552
30	498149	498673	LDBPK_301480	Ama1 protein	3	AM552
30	498977	499222	LDBPK_301490	Ama1 protein	3	AM552
30	1181585	1182820	LDBPK_303210	Putative uncharacterized protein	4	AM552
30	1185565	1185990	LDBPK_303220	Putative uncharacterized protein	4	AM552
30	1188152	1189456	LDBPK_303230	3-hydroxy-3-methylglutaryl-CoA reductase	4	AM552
31	670326	670781	LDBPK_311470	Putative uncharacterized protein	1	AM552
31	771427	773862	LDBPK_311630	Putative uncharacterized protein	3	AM552
31	774133	774948	LDBPK_311640	Diphthine synthase-like protein	3	AM552
31	775217	775756	LDBPK_311650	Putative uncharacterized protein	3	AM552
31	778270	778329	LDBPK_311660	Putative 3-ketoacyl-coa thiolase-like protein	3	AM552
33	1380390	1380647	LDBPK_333230	Putative uncharacterized protein (Fragment)	1	AM552
34	418436	419071	LDBPK_341010	Amastin-like surface protein	3	AM552
34	425622	426134	LDBPK_341020	Amastin-like surface protein	3	AM552
34	1155486	1155740	LDBPK_342650	Amastin-like surface protein	1	AM552
34	1160118	1160435	LDBPK_342660	Amastin-like surface protein	1	AM552
36	1571715	1572758	LDBPK_364270	Phosphoglycerate mutase family member 5	1	AM552
36	2526888	2527169	LDBPK_366740	Tartrate-sensitive acid phosphatase acp-3.2	1	AM552
36	2528652	2530061	LDBPK_366750	Putative uncharacterized protein	1	AM552
36	2531707	2532783	LDBPK_366760	Mitogen activated protein kinase homologue	1	AM552
4	51206	52510	LDBPK_040150	Putative uncharacterized protein	3	AM553
4	53006	54583	LDBPK_040160	Putative uncharacterized protein	3	AM553
4	57483	58529	LDBPK_040170	Surface antigen-like protein (Fragment)	3	AM553
9	447763	448602	LDBPK_091130	Eukaryotic translation initiation factor 2 subunit	3	AM553
9	452959	453159	LDBPK_091140	Translation initiation factor EIF-2B gamma subunit	3	AM553
9	454006	454773	LDBPK_091160	Putative uncharacterized protein	3	AM553
10	170745	171935	LDBPK_100400	Folate/biopterin transporter	1	AM553
10	178404	179465	LDBPK_100410	Folate/biopterin transporter	1	AM553
10	205475	205726	LDBPK_100480	Putative uncharacterized protein	3	AM553
10	213241	213495	LDBPK_100510	GP63	3	AM553
10	220588	220848	LDBPK_100520	GP63	3	AM553
10	224849	225082	LDBPK_100521	Putative uncharacterized protein	3	AM553
14	250499	251383	LDBPK_140700	Fatty acid elongase	3	AM553
19	572975	574054	LDBPK_191340	Glycerol uptake protein	3	AM553
19	572975	574051	LDBPK_191350	Glycerol uptake protein	3	AM553
28	756654	756995	LDBPK_282040	Putative uncharacterized protein	3	AM553
28	760309	761703	LDBPK_282050	Zinc transporter	3	AM553
28	1080458	1081396	LDBPK_282970	Activated protein kinase c receptor (LACK)	3	AM553
28	1082446	1084230	LDBPK_282980	Gamma-tubulin complex subunit	3	AM553
30	572069	575023	LDBPK_301630	Ferric reductase	3	AM553
31	670326	670781	LDBPK_311470	Putative uncharacterized protein	1	AM553
31	771427	773862	LDBPK_311630	Putative uncharacterized protein	3	AM553
31	774133	774948	LDBPK_311640	Diphthine synthase-like protein	3	AM553
31	775217	775756	LDBPK_311650	Putative uncharacterized protein	3	AM553
31	778270	778329	LDBPK_311660	Putative 3-ketoacyl-coa thiolase-like protein	3	AM553
31	930420	932993	LDBPK_311920	Mannosyltransferase-like protein	3	AM553
31	937932	938318	LDBPK_311930	Ubiquitin-fusion protein	3	AM553
36	2531707	2532783	LDBPK_366760	Mitogen activated protein kinase homologue	1	AM553
4	57483	58529	LDBPK_040170	Surface antigen-like protein (Fragment)	3	AM554
4	60774	62483	LDBPK_040180	Surface antigen-like protein (Fragment)	3	AM554
4	63975	64523	LDBPK_040190	Surface antigen-like protein	3	AM554
10	162754	163668	LDBPK_100390	Folate/biopterin transporter	1	AM554
10	170745	171935	LDBPK_100400	Folate/biopterin transporter	1	AM554
10	178404	179465	LDBPK_100410	Folate/biopterin transporter	1	AM554
11	501882	502019	LDBPK_111220	ABC transporter-like protein (Fragment)	1	AM554
11	505709	509374	LDBPK_111230	ATP-binding cassette protein subfamily A	1	AM554
19	572975	574054	LDBPK_191340	Glycerol uptake protein	3	AM554
19	572975	574051	LDBPK_191350	Glycerol uptake protein	3	AM554
19	727135	727818	LDBPK_191690	Putative uncharacterized protein (Fragment)	3	AM554
22	666638	666850	LDBPK_221550	Putative uncharacterized protein	1	AM554
23	435473	436495	LDBPK_231050	Quinone oxidoreductase-like protein	3	AM554
23	508143	508202	LDBPK_231240	Hydrophilic acylated surface protein a (Fragment)	3	AM554
27	798359	799840	LDBPK_271940	D-lactate dehydrogenase-like protein	1	AM554
27	803591	804793	LDBPK_271950	Branched-chain amino acid aminotransferase	1	AM554
28	756654	756995	LDBPK_282040	Putative uncharacterized protein	3	AM554
28	760309	761703	LDBPK_282050	Zinc transporter	3	AM554
30	1181585	1182820	LDBPK_303210	Putative uncharacterized protein	4	AM554
30	1185565	1185990	LDBPK_303220	Putative uncharacterized protein	4	AM554
30	1188152	1189456	LDBPK_303230	3-hydroxy-3-methylglutaryl-CoA reductase	4	AM554
31	670326	670781	LDBPK_311470	Putative uncharacterized protein	1	AM554
31	771427	773862	LDBPK_311630	Putative uncharacterized protein	3	AM554
31	774133	774948	LDBPK_311640	Diphthine synthase-like protein	3	AM554
31	775217	775756	LDBPK_311650	Putative uncharacterized protein	3	AM554
31	778270	778329	LDBPK_311660	Putative 3-ketoacyl-coa thiolase-like protein	3	AM554
33	1380390	1380647	LDBPK_333230	Putative uncharacterized protein (Fragment)	1	AM554
34	1155486	1155740	LDBPK_342650	Amastin-like surface protein	1	AM554
34	1160118	1160435	LDBPK_342660	Amastin-like surface protein	1	AM554
36	1571715	1572758	LDBPK_364270	Phosphoglycerate mutase family member 5	1	AM554
36	2526888	2527169	LDBPK_366740	Tartrate-sensitive acid phosphatase acp-3.2	1	AM554
36	2528652	2530061	LDBPK_366750	Putative uncharacterized protein	1	AM554
36	2531707	2532783	LDBPK_366760	Mitogen activated protein kinase homologue	1	AM554
4	51206	52510	LDBPK_040150	Putative uncharacterized protein	3	AM560I
4	53006	54583	LDBPK_040160	Putative uncharacterized protein	3	AM560I
4	57483	58529	LDBPK_040170	Surface antigen-like protein (Fragment)	3	AM560I
8	338970	339551	LDBPK_080780	Amastin-like protein	3	AM560I
8	340014	340298	LDBPK_080790	Amastin-like protein	3	AM560I
9	369224	369463	LDBPK_090950	Polyubiquitin (Fragment)	3	AM560I
9	370617	371177	LDBPK_090960	Ef-hand protein 5	3	AM560I
9	372847	373296	LDBPK_090970	Calmodulin	3	AM560I
10	162754	163668	LDBPK_100390	Folate/biopterin transporter	1	AM560I
10	170745	171935	LDBPK_100400	Folate/biopterin transporter	1	AM560I
10	178404	179465	LDBPK_100410	Folate/biopterin transporter	1	AM560I
10	205475	205726	LDBPK_100480	Putative uncharacterized protein	3	AM560I
10	213241	213495	LDBPK_100510	GP63	3	AM560I
10	220588	220848	LDBPK_100520	GP63	3	AM560I
10	224849	225082	LDBPK_100521	Putative uncharacterized protein	3	AM560I
12	410501	411088	LDBPK_120667	Putative uncharacterized protein LDBPK_120667	1	AM560I
14	132416	132526	LDBPK_140390	Putative uncharacterized protein	4	AM560I
14	135623	136555	LDBPK_140400	Putative uncharacterized protein	4	AM560I
18	726717	728711	LDBPK_181670	Putative uncharacterized protein	3	AM560I
19	231925	233097	LDBPK_190570	Putative uncharacterized protein (Fragment)	3	AM560I
19	572975	574054	LDBPK_191340	Glycerol uptake protein	3	AM560I
19	572975	574051	LDBPK_191350	Glycerol uptake protein	3	AM560I
19	693236	694918	LDBPK_191670	Putative uncharacterized protein	3	AM560I
19	704114	704569	LDBPK_191680	Putative uncharacterized protein	3	AM560I
19	727135	727818	LDBPK_191690	Putative uncharacterized protein (Fragment)	3	AM560I
21	661627	662940	LDBPK_211850	Putative uncharacterized protein	3	AM560I
22	666638	666850	LDBPK_221550	Putative uncharacterized protein	1	AM560I
23	435473	436495	LDBPK_231050	Quinone oxidoreductase-like protein	4	AM560I
23	508143	508202	LDBPK_231240	Hydrophilic acylated surface protein a (Fragment)	3	AM560I
24	161201	161887	LDBPK_240460	Hypothetical predicted transmembrane protein (Fragment)	3	AM560I
27	318748	319674	LDBPK_270780	Putative uncharacterized protein	3	AM560I
27	798359	799840	LDBPK_271940	D-lactate dehydrogenase-like protein	1	AM560I
27	803591	804793	LDBPK_271950	Branched-chain amino acid aminotransferase	1	AM560I
28	756654	756995	LDBPK_282040	Putative uncharacterized protein	3	AM560I
28	760309	761703	LDBPK_282050	Zinc transporter	3	AM560I
29	715106	715465	LDBPK_291620	Putative uncharacterized protein (Fragment)	1	AM560I
29	721206	721553	LDBPK_291630	Putative uncharacterized protein	1	AM560I
30	498149	498673	LDBPK_301480	Ama1 protein	3	AM560I
30	498977	499222	LDBPK_301490	Ama1 protein	3	AM560I
30	572069	575023	LDBPK_301630	Ferric reductase	3	AM560I
30	1181585	1182820	LDBPK_303210	Putative uncharacterized protein	4	AM560I
30	1185565	1185990	LDBPK_303220	Putative uncharacterized protein	4	AM560I
30	1188152	1189456	LDBPK_303230	3-hydroxy-3-methylglutaryl-CoA reductase	4	AM560I
31	522936	524792	LDBPK_311300	ATP-binding cassette protein subfamily C	3	AM560I
31	670326	670781	LDBPK_311470	Putative uncharacterized protein	1	AM560I
31	771427	773862	LDBPK_311630	Putative uncharacterized protein	3	AM560I
31	774133	774948	LDBPK_311640	Diphthine synthase-like protein	3	AM560I
31	775217	775756	LDBPK_311650	Putative uncharacterized protein	3	AM560I
31	778270	778329	LDBPK_311660	Putative 3-ketoacyl-coa thiolase-like protein	3	AM560I
31	930420	932993	LDBPK_311920	Mannosyltransferase-like protein	3	AM560I
31	937932	938318	LDBPK_311930	Ubiquitin-fusion protein	3	AM560I
34	418436	419071	LDBPK_341010	Amastin-like surface protein	3	AM560I
34	425622	426134	LDBPK_341020	Amastin-like surface protein	3	AM560I
34	728956	729774	LDBPK_341700	Amastin-like surface protein	4	AM560I
34	1155486	1155740	LDBPK_342650	Amastin-like surface protein	1	AM560I
34	1160118	1160435	LDBPK_342660	Amastin-like surface protein	1	AM560I
36	2526888	2527169	LDBPK_366740	Tartrate-sensitive acid phosphatase acp-3.2	1	AM560I
36	2528652	2530061	LDBPK_366750	Putative uncharacterized protein	1	AM560I
36	2531707	2532783	LDBPK_366760	Mitogen activated protein kinase homologue	1	AM560I
4	51206	52510	LDBPK_040150	Putative uncharacterized protein	3	AM560II
4	53006	54583	LDBPK_040160	Putative uncharacterized protein	3	AM560II
4	57483	58529	LDBPK_040170	Surface antigen-like protein (Fragment)	3	AM560II
9	369224	369463	LDBPK_090950	Polyubiquitin (Fragment)	3	AM560II
9	370617	371177	LDBPK_090960	Ef-hand protein 5	3	AM560II
9	372847	373296	LDBPK_090970	Calmodulin	3	AM560II
10	162754	163668	LDBPK_100390	Folate/biopterin transporter	1	AM560II
10	170745	171935	LDBPK_100400	Folate/biopterin transporter	1	AM560II
10	178404	179465	LDBPK_100410	Folate/biopterin transporter	1	AM560II
10	205475	205726	LDBPK_100480	Putative uncharacterized protein	3	AM560II
10	213241	213495	LDBPK_100510	GP63	3	AM560II
10	220588	220848	LDBPK_100520	GP63	3	AM560II
10	224849	225082	LDBPK_100521	Putative uncharacterized protein	3	AM560II
12	410501	411088	LDBPK_120667	Putative uncharacterized protein LDBPK_120667	1	AM560II
14	132416	132526	LDBPK_140390	Putative uncharacterized protein	4	AM560II
14	135623	136555	LDBPK_140400	Putative uncharacterized protein	4	AM560II
19	572975	574054	LDBPK_191340	Glycerol uptake protein	3	AM560II
19	572975	574051	LDBPK_191350	Glycerol uptake protein	3	AM560II
19	693236	694918	LDBPK_191670	Putative uncharacterized protein	3	AM560II
19	704114	704569	LDBPK_191680	Putative uncharacterized protein	3	AM560II
19	727135	727818	LDBPK_191690	Putative uncharacterized protein (Fragment)	4	AM560II
21	661627	662940	LDBPK_211850	Putative uncharacterized protein	3	AM560II
23	435473	436495	LDBPK_231050	Quinone oxidoreductase-like protein	4	AM560II
23	508143	508202	LDBPK_231240	Hydrophilic acylated surface protein a (Fragment)	3	AM560II
24	161201	161887	LDBPK_240460	Hypothetical predicted transmembrane protein (Fragment)	3	AM560II
27	318748	319674	LDBPK_270780	Putative uncharacterized protein	3	AM560II
27	798359	799840	LDBPK_271940	D-lactate dehydrogenase-like protein	1	AM560II
27	803591	804793	LDBPK_271950	Branched-chain amino acid aminotransferase	1	AM560II
28	756654	756995	LDBPK_282040	Putative uncharacterized protein	3	AM560II
28	760309	761703	LDBPK_282050	Zinc transporter	3	AM560II
29	715106	715465	LDBPK_291620	Putative uncharacterized protein (Fragment)	1	AM560II
29	721206	721553	LDBPK_291630	Putative uncharacterized protein	1	AM560II
30	498149	498673	LDBPK_301480	Ama1 protein	3	AM560II
30	498977	499222	LDBPK_301490	Ama1 protein	3	AM560II
30	1181585	1182820	LDBPK_303210	Putative uncharacterized protein	4	AM560II
30	1185565	1185990	LDBPK_303220	Putative uncharacterized protein	4	AM560II
30	1188152	1189456	LDBPK_303230	3-hydroxy-3-methylglutaryl-CoA reductase	4	AM560II
31	522936	524792	LDBPK_311300	ATP-binding cassette protein subfamily C	3	AM560II
31	670326	670781	LDBPK_311470	Putative uncharacterized protein	1	AM560II
31	771427	773862	LDBPK_311630	Putative uncharacterized protein	3	AM560II
31	774133	774948	LDBPK_311640	Diphthine synthase-like protein	3	AM560II
31	775217	775756	LDBPK_311650	Putative uncharacterized protein	3	AM560II
31	778270	778329	LDBPK_311660	Putative 3-ketoacyl-coa thiolase-like protein	3	AM560II
31	930420	932993	LDBPK_311920	Mannosyltransferase-like protein	3	AM560II
31	937932	938318	LDBPK_311930	Ubiquitin-fusion protein	3	AM560II
34	353914	354366	LDBPK_340840	Serine/threonine-protein phosphatase (Fragment)	3	AM560II
34	358945	359430	LDBPK_340850	Serine/threonine-protein phosphatase (Fragment)	3	AM560II
34	418436	419071	LDBPK_341010	Amastin-like surface protein	3	AM560II
34	425622	426134	LDBPK_341020	Amastin-like surface protein	3	AM560II
34	1155486	1155740	LDBPK_342650	Amastin-like surface protein	1	AM560II
34	1160118	1160435	LDBPK_342660	Amastin-like surface protein	1	AM560II
36	2526888	2527169	LDBPK_366740	Tartrate-sensitive acid phosphatase acp-3.2	1	AM560II
36	2528652	2530061	LDBPK_366750	Putative uncharacterized protein	1	AM560II
36	2531707	2532783	LDBPK_366760	Mitogen activated protein kinase homologue	1	AM560II
4	51206	52510	LDBPK_040150	Putative uncharacterized protein	3	AM560III
4	53006	54583	LDBPK_040160	Putative uncharacterized protein	3	AM560III
4	57483	58529	LDBPK_040170	Surface antigen-like protein (Fragment)	3	AM560III
6	35984	36377	LDBPK_060080	ATP-binding cassette protein subfamily G	3	AM560III
6	42258	42698	LDBPK_060090	ATP-binding cassette protein subfamily G	3	AM560III
6	44108	44215	LDBPK_060100	ATP-binding cassette protein subfamily G	3	AM560III
8	338970	339551	LDBPK_080780	Amastin-like protein	3	AM560III
8	340014	340298	LDBPK_080790	Amastin-like protein	3	AM560III
9	369224	369463	LDBPK_090950	Polyubiquitin (Fragment)	3	AM560III
9	370617	371177	LDBPK_090960	Ef-hand protein 5	3	AM560III
9	372847	373296	LDBPK_090970	Calmodulin	3	AM560III
10	170745	171935	LDBPK_100400	Folate/biopterin transporter	1	AM560III
10	178404	179465	LDBPK_100410	Folate/biopterin transporter	1	AM560III
10	205475	205726	LDBPK_100480	Putative uncharacterized protein	3	AM560III
10	213241	213495	LDBPK_100510	GP63	3	AM560III
10	220588	220848	LDBPK_100520	GP63	3	AM560III
10	224849	225082	LDBPK_100521	Putative uncharacterized protein	3	AM560III
12	410501	411088	LDBPK_120667	Putative uncharacterized protein LDBPK_120667	1	AM560III
14	132416	132526	LDBPK_140390	Putative uncharacterized protein	4	AM560III
14	135623	136555	LDBPK_140400	Putative uncharacterized protein	4	AM560III
18	287537	288460	LDBPK_180700	Citrate synthase (Fragment)	3	AM560III
18	726717	728711	LDBPK_181670	Putative uncharacterized protein	3	AM560III
19	231925	233097	LDBPK_190570	Putative uncharacterized protein (Fragment)	3	AM560III
19	572975	574054	LDBPK_191340	Glycerol uptake protein	3	AM560III
19	572975	574051	LDBPK_191350	Glycerol uptake protein	3	AM560III
19	693236	694918	LDBPK_191670	Putative uncharacterized protein	3	AM560III
19	704114	704569	LDBPK_191680	Putative uncharacterized protein	3	AM560III
19	727135	727818	LDBPK_191690	Putative uncharacterized protein (Fragment)	4	AM560III
21	661627	662940	LDBPK_211850	Putative uncharacterized protein	3	AM560III
23	435473	436495	LDBPK_231050	Quinone oxidoreductase-like protein	4	AM560III
23	508143	508202	LDBPK_231240	Hydrophilic acylated surface protein a (Fragment)	3	AM560III
24	161201	161887	LDBPK_240460	Hypothetical predicted transmembrane protein (Fragment)	3	AM560III
27	318748	319674	LDBPK_270780	Putative uncharacterized protein	3	AM560III
27	798359	799840	LDBPK_271940	D-lactate dehydrogenase-like protein	1	AM560III
27	803591	804793	LDBPK_271950	Branched-chain amino acid aminotransferase	1	AM560III
28	756654	756995	LDBPK_282040	Putative uncharacterized protein	3	AM560III
28	760309	761703	LDBPK_282050	Zinc transporter	3	AM560III
29	715106	715465	LDBPK_291620	Putative uncharacterized protein (Fragment)	1	AM560III
29	721206	721553	LDBPK_291630	Putative uncharacterized protein	1	AM560III
30	498149	498673	LDBPK_301480	Ama1 protein	3	AM560III
30	498977	499222	LDBPK_301490	Ama1 protein	3	AM560III
30	572069	575023	LDBPK_301630	Ferric reductase	3	AM560III
30	1181585	1182820	LDBPK_303210	Putative uncharacterized protein	4	AM560III
30	1185565	1185990	LDBPK_303220	Putative uncharacterized protein	4	AM560III
30	1188152	1189456	LDBPK_303230	3-hydroxy-3-methylglutaryl-CoA reductase	4	AM560III
31	522936	524792	LDBPK_311300	ATP-binding cassette protein subfamily C	3	AM560III
31	670326	670781	LDBPK_311470	Putative uncharacterized protein	1	AM560III
31	771427	773862	LDBPK_311630	Putative uncharacterized protein	3	AM560III
31	774133	774948	LDBPK_311640	Diphthine synthase-like protein	3	AM560III
31	775217	775756	LDBPK_311650	Putative uncharacterized protein	3	AM560III
31	778270	778329	LDBPK_311660	Putative 3-ketoacyl-coa thiolase-like protein	3	AM560III
31	930420	932993	LDBPK_311920	Mannosyltransferase-like protein	3	AM560III
31	937932	938318	LDBPK_311930	Ubiquitin-fusion protein	3	AM560III
34	353914	354366	LDBPK_340840	Serine/threonine-protein phosphatase (Fragment)	3	AM560III
34	358945	359430	LDBPK_340850	Serine/threonine-protein phosphatase (Fragment)	3	AM560III
34	418436	419071	LDBPK_341010	Amastin-like surface protein	3	AM560III
34	425622	426134	LDBPK_341020	Amastin-like surface protein	3	AM560III
34	1155486	1155740	LDBPK_342650	Amastin-like surface protein	1	AM560III
34	1160118	1160435	LDBPK_342660	Amastin-like surface protein	1	AM560III
36	2526888	2527169	LDBPK_366740	Tartrate-sensitive acid phosphatase acp-3.2	1	AM560III
36	2528652	2530061	LDBPK_366750	Putative uncharacterized protein	1	AM560III
36	2531707	2532783	LDBPK_366760	Mitogen activated protein kinase homologue	1	AM560III
4	51206	52510	LDBPK_040150	Putative uncharacterized protein	3	AM560IV
4	53006	54583	LDBPK_040160	Putative uncharacterized protein	3	AM560IV
4	57483	58529	LDBPK_040170	Surface antigen-like protein (Fragment)	3	AM560IV
8	338970	339551	LDBPK_080780	Amastin-like protein	3	AM560IV
8	340014	340298	LDBPK_080790	Amastin-like protein	3	AM560IV
9	369224	369463	LDBPK_090950	Polyubiquitin (Fragment)	3	AM560IV
9	370617	371177	LDBPK_090960	Ef-hand protein 5	3	AM560IV
9	372847	373296	LDBPK_090970	Calmodulin	3	AM560IV
10	162754	163668	LDBPK_100390	Folate/biopterin transporter	1	AM560IV
10	170745	171935	LDBPK_100400	Folate/biopterin transporter	1	AM560IV
10	178404	179465	LDBPK_100410	Folate/biopterin transporter	1	AM560IV
10	205475	205726	LDBPK_100480	Putative uncharacterized protein	3	AM560IV
10	213241	213495	LDBPK_100510	GP63	3	AM560IV
10	220588	220848	LDBPK_100520	GP63	3	AM560IV
10	224849	225082	LDBPK_100521	Putative uncharacterized protein	3	AM560IV
12	410501	411088	LDBPK_120667	Putative uncharacterized protein LDBPK_120667	1	AM560IV
14	132416	132526	LDBPK_140390	Putative uncharacterized protein	4	AM560IV
14	135623	136555	LDBPK_140400	Putative uncharacterized protein	4	AM560IV
18	726717	728711	LDBPK_181670	Putative uncharacterized protein	3	AM560IV
19	231925	233097	LDBPK_190570	Putative uncharacterized protein (Fragment)	3	AM560IV
19	572975	574054	LDBPK_191340	Glycerol uptake protein	3	AM560IV
19	572975	574051	LDBPK_191350	Glycerol uptake protein	3	AM560IV
19	727135	727818	LDBPK_191690	Putative uncharacterized protein (Fragment)	4	AM560IV
21	661627	662940	LDBPK_211850	Putative uncharacterized protein	3	AM560IV
23	435473	436495	LDBPK_231050	Quinone oxidoreductase-like protein	4	AM560IV
23	508143	508202	LDBPK_231240	Hydrophilic acylated surface protein a (Fragment)	3	AM560IV
24	161201	161887	LDBPK_240460	Hypothetical predicted transmembrane protein (Fragment)	3	AM560IV
27	318748	319674	LDBPK_270780	Putative uncharacterized protein	3	AM560IV
27	798359	799840	LDBPK_271940	D-lactate dehydrogenase-like protein	1	AM560IV
27	803591	804793	LDBPK_271950	Branched-chain amino acid aminotransferase	1	AM560IV
28	756654	756995	LDBPK_282040	Putative uncharacterized protein	3	AM560IV
28	760309	761703	LDBPK_282050	Zinc transporter	3	AM560IV
29	715106	715465	LDBPK_291620	Putative uncharacterized protein (Fragment)	1	AM560IV
29	721206	721553	LDBPK_291630	Putative uncharacterized protein	1	AM560IV
30	498149	498673	LDBPK_301480	Ama1 protein	3	AM560IV
30	498977	499222	LDBPK_301490	Ama1 protein	3	AM560IV
30	572069	575023	LDBPK_301630	Ferric reductase	3	AM560IV
30	1181585	1182820	LDBPK_303210	Putative uncharacterized protein	4	AM560IV
30	1185565	1185990	LDBPK_303220	Putative uncharacterized protein	4	AM560IV
30	1188152	1189456	LDBPK_303230	3-hydroxy-3-methylglutaryl-CoA reductase	4	AM560IV
31	522936	524792	LDBPK_311300	ATP-binding cassette protein subfamily C	3	AM560IV
31	670326	670781	LDBPK_311470	Putative uncharacterized protein	1	AM560IV
31	771427	773862	LDBPK_311630	Putative uncharacterized protein	3	AM560IV
31	774133	774948	LDBPK_311640	Diphthine synthase-like protein	3	AM560IV
31	775217	775756	LDBPK_311650	Putative uncharacterized protein	3	AM560IV
31	778270	778329	LDBPK_311660	Putative 3-ketoacyl-coa thiolase-like protein	3	AM560IV
31	930420	932993	LDBPK_311920	Mannosyltransferase-like protein	3	AM560IV
31	937932	938318	LDBPK_311930	Ubiquitin-fusion protein	3	AM560IV
34	418436	419071	LDBPK_341010	Amastin-like surface protein	3	AM560IV
34	425622	426134	LDBPK_341020	Amastin-like surface protein	3	AM560IV
34	724932	725564	LDBPK_341690	Amastin-like surface protein	4	AM560IV
34	728956	729774	LDBPK_341700	Amastin-like surface protein	4	AM560IV
34	1155486	1155740	LDBPK_342650	Amastin-like surface protein	1	AM560IV
34	1160118	1160435	LDBPK_342660	Amastin-like surface protein	1	AM560IV
36	2526888	2527169	LDBPK_366740	Tartrate-sensitive acid phosphatase acp-3.2	1	AM560IV
36	2528652	2530061	LDBPK_366750	Putative uncharacterized protein	1	AM560IV
36	2531707	2532783	LDBPK_366760	Mitogen activated protein kinase homologue	1	AM560IV
4	57483	58529	LDBPK_040170	Surface antigen-like protein (Fragment)	4	AM563I
4	60774	62483	LDBPK_040180	Surface antigen-like protein (Fragment)	4	AM563I
4	63975	64523	LDBPK_040190	Surface antigen-like protein	4	AM563I
7	404916	406232	LDBPK_070980	Putative uncharacterized protein	6	AM563I
7	413161	413517	LDBPK_070990	Putative uncharacterized protein (Fragment)	6	AM563I
8	338970	339551	LDBPK_080780	Amastin-like protein	3	AM563I
8	340014	340298	LDBPK_080790	Amastin-like protein	3	AM563I
8	496854	497294	LDBPK_081290	Beta tubulin (Fragment)	4	AM563I
8	500099	501991	LDBPK_081300	Histone deacetylase	4	AM563I
8	503422	503463	LDBPK_081310	Putative uncharacterized protein	4	AM563I
9	369224	369463	LDBPK_090950	Polyubiquitin (Fragment)	3	AM563I
9	370617	371177	LDBPK_090960	Ef-hand protein 5	3	AM563I
9	372847	373296	LDBPK_090970	Calmodulin	3	AM563I
9	447763	448602	LDBPK_091130	Eukaryotic translation initiation factor 2 subunit	3	AM563I
9	452959	453159	LDBPK_091140	Translation initiation factor EIF-2B gamma subunit	3	AM563I
9	454006	454773	LDBPK_091160	Putative uncharacterized protein	3	AM563I
10	162754	163668	LDBPK_100390	Folate/biopterin transporter	1	AM563I
10	170745	171935	LDBPK_100400	Folate/biopterin transporter	1	AM563I
10	178404	179465	LDBPK_100410	Folate/biopterin transporter	1	AM563I
10	205475	205726	LDBPK_100480	Putative uncharacterized protein	3	AM563I
10	213241	213495	LDBPK_100510	GP63	3	AM563I
10	220588	220848	LDBPK_100520	GP63	3	AM563I
10	224849	225082	LDBPK_100521	Putative uncharacterized protein	3	AM563I
11	501882	502019	LDBPK_111220	ABC transporter-like protein (Fragment)	1	AM563I
11	505709	509374	LDBPK_111230	ATP-binding cassette protein subfamily A	1	AM563I
12	410501	411088	LDBPK_120667	Putative uncharacterized protein LDBPK_120667	1	AM563I
14	132416	132526	LDBPK_140390	Putative uncharacterized protein	3	AM563I
14	135623	136555	LDBPK_140400	Putative uncharacterized protein	3	AM563I
14	250499	251383	LDBPK_140700	Fatty acid elongase	3	AM563I
18	287537	288460	LDBPK_180700	Citrate synthase (Fragment)	3	AM563I
19	231925	233097	LDBPK_190570	Putative uncharacterized protein (Fragment)	3	AM563I
19	572975	574054	LDBPK_191340	Glycerol uptake protein	3	AM563I
19	572975	574051	LDBPK_191350	Glycerol uptake protein	3	AM563I
19	626399	627463	LDBPK_191460	Cysteine peptidase A (CBA)	3	AM563I
19	727135	727818	LDBPK_191690	Putative uncharacterized protein (Fragment)	3	AM563I
21	661627	662940	LDBPK_211850	Putative uncharacterized protein	3	AM563I
23	435473	436495	LDBPK_231050	Quinone oxidoreductase-like protein	3	AM563I
23	508143	508202	LDBPK_231240	Hydrophilic acylated surface protein a (Fragment)	3	AM563I
24	161201	161887	LDBPK_240460	Hypothetical predicted transmembrane protein (Fragment)	3	AM563I
27	318748	319674	LDBPK_270780	Putative uncharacterized protein	3	AM563I
27	798359	799840	LDBPK_271940	D-lactate dehydrogenase-like protein	1	AM563I
27	803591	804793	LDBPK_271950	Branched-chain amino acid aminotransferase	1	AM563I
28	756654	756995	LDBPK_282040	Putative uncharacterized protein	3	AM563I
28	760309	761703	LDBPK_282050	Zinc transporter	3	AM563I
29	1097019	1097486	LDBPK_292560	Heat shock protein 20	3	AM563I
29	1100676	1100873	LDBPK_292570	60S ribosomal protein L13	3	AM563I
29	1102714	1102899	LDBPK_292580	60S ribosomal protein L13	3	AM563I
30	498149	498673	LDBPK_301480	Ama1 protein	3	AM563I
30	498977	499222	LDBPK_301490	Ama1 protein	3	AM563I
30	572069	575023	LDBPK_301630	Ferric reductase	1	AM563I
30	578031	580121	LDBPK_301640	Putative uncharacterized protein	1	AM563I
30	581219	581605	LDBPK_301650	Putative uncharacterized protein	1	AM563I
30	582895	583347	LDBPK_301660	Putative uncharacterized protein	1	AM563I
30	1181585	1182820	LDBPK_303210	Putative uncharacterized protein	4	AM563I
30	1185565	1185990	LDBPK_303220	Putative uncharacterized protein	4	AM563I
30	1188152	1189456	LDBPK_303230	3-hydroxy-3-methylglutaryl-CoA reductase	4	AM563I
31	522936	524792	LDBPK_311300	ATP-binding cassette protein subfamily C	3	AM563I
31	670326	670781	LDBPK_311470	Putative uncharacterized protein	1	AM563I
31	771427	773862	LDBPK_311630	Putative uncharacterized protein	3	AM563I
31	774133	774948	LDBPK_311640	Diphthine synthase-like protein	3	AM563I
31	775217	775756	LDBPK_311650	Putative uncharacterized protein	3	AM563I
31	778270	778329	LDBPK_311660	Putative 3-ketoacyl-coa thiolase-like protein	3	AM563I
33	1380390	1380647	LDBPK_333230	Putative uncharacterized protein (Fragment)	1	AM563I
34	418436	419071	LDBPK_341010	Amastin-like surface protein	3	AM563I
34	425622	426134	LDBPK_341020	Amastin-like surface protein	3	AM563I
34	724932	725564	LDBPK_341690	Amastin-like surface protein	4	AM563I
34	728956	729774	LDBPK_341700	Amastin-like surface protein	4	AM563I
34	1155486	1155740	LDBPK_342650	Amastin-like surface protein	1	AM563I
34	1160118	1160435	LDBPK_342660	Amastin-like surface protein	1	AM563I
36	2526888	2527169	LDBPK_366740	Tartrate-sensitive acid phosphatase acp-3.2	1	AM563I
36	2528652	2530061	LDBPK_366750	Putative uncharacterized protein	1	AM563I
36	2531707	2532783	LDBPK_366760	Mitogen activated protein kinase homologue	1	AM563I
8	338970	339551	LDBPK_080780	Amastin-like protein	3	GR356I
8	340014	340298	LDBPK_080790	Amastin-like protein	3	GR356I
9	7491	7925	LDBPK_090010	Putative uncharacterized protein	3	GR356I
9	8490	9611	LDBPK_090020	Putative uncharacterized protein	3	GR356I
9	10252	10575	LDBPK_090030	Putative uncharacterized protein	3	GR356I
9	11797	13656	LDBPK_090040	Putative uncharacterized protein	3	GR356I
9	14101	15063	LDBPK_090050	Putative uncharacterized protein	3	GR356I
9	15768	16517	LDBPK_090060	N-acetyl-D-glucosaminylphosphatidylinositol de-N-acetylase	3	GR356I
9	18283	19059	LDBPK_090070	Endonuclease III	3	GR356I
10	162754	163668	LDBPK_100390	Folate/biopterin transporter	3	GR356I
10	170745	171935	LDBPK_100400	Folate/biopterin transporter	3	GR356I
10	178404	179465	LDBPK_100410	Folate/biopterin transporter	3	GR356I
14	250499	251383	LDBPK_140700	Fatty acid elongase	4	GR356I
16	581504	583303	LDBPK_161510	Paraflagellar rod protein 2C	3	GR356I
16	584827	585009	LDBPK_161520	Paraflagellar rod protein 2C	3	GR356I
18	287537	288460	LDBPK_180700	Citrate synthase (Fragment)	3	GR356I
19	231925	233097	LDBPK_190570	Putative uncharacterized protein (Fragment)	3	GR356I
19	693236	694918	LDBPK_191670	Putative uncharacterized protein	3	GR356I
19	727135	727818	LDBPK_191690	Putative uncharacterized protein (Fragment)	4	GR356I
21	661627	662940	LDBPK_211850	Putative uncharacterized protein	3	GR356I
22	555165	555614	LDBPK_221260	Centrin	3	GR356I
22	558326	559210	LDBPK_221270	Aquaporin	3	GR356I
22	560214	560549	LDBPK_221280	Peptidyl-prolyl cis-trans isomerase	3	GR356I
23	96936	98192	LDBPK_230300	Argininosuccinate synthase	4	GR356I
24	161201	161887	LDBPK_240460	Hypothetical predicted transmembrane protein (Fragment)	3	GR356I
27	318748	319674	LDBPK_270780	Putative uncharacterized protein	3	GR356I
29	713073	714938	LDBPK_291610	Putative uncharacterized protein	4	GR356I
29	715106	715465	LDBPK_291620	Putative uncharacterized protein (Fragment)	4	GR356I
29	721206	721553	LDBPK_291630	Putative uncharacterized protein	4	GR356I
29	961447	962877	LDBPK_292240	Putative uncharacterized protein	3	GR356I
29	1097019	1097486	LDBPK_292560	Heat shock protein 20	3	GR356I
29	1100676	1100873	LDBPK_292570	60S ribosomal protein L13	3	GR356I
29	1102714	1102899	LDBPK_292580	60S ribosomal protein L13	3	GR356I
30	498149	498673	LDBPK_301480	Ama1 protein	3	GR356I
30	498977	499222	LDBPK_301490	Ama1 protein	3	GR356I
31	522936	524792	LDBPK_311300	ATP-binding cassette protein subfamily C	3	GR356I
31	865260	866147	LDBPK_311850	Amino acid permease (Fragment)	3	GR356I
31	873599	873946	LDBPK_311860	Amino acid permease (Fragment)	3	GR356I
31	1135273	1137138	LDBPK_312330	Aminopeptidase	3	GR356I
31	1138936	1140324	LDBPK_312340	Putative uncharacterized protein	3	GR356I
31	1143541	1144089	LDBPK_312350	ADP-ribosylation factor	3	GR356I
34	353914	354366	LDBPK_340840	Serine/threonine-protein phosphatase (Fragment)	3	GR356I
34	358945	359430	LDBPK_340850	Serine/threonine-protein phosphatase (Fragment)	3	GR356I
34	1155486	1155740	LDBPK_342650	Amastin-like surface protein	4	GR356I
34	1160118	1160435	LDBPK_342660	Amastin-like surface protein	4	GR356I
36	1571715	1572758	LDBPK_364270	Phosphoglycerate mutase family member 5	3	GR356I
36	2541722	2542810	LDBPK_366770	Histidine secretory acid phosphatase	3	GR356I
36	2543534	2544511	LDBPK_366780	Ubiquitin fusion degradation protein	3	GR356I
8	338970	339551	LDBPK_080780	Amastin-like protein	3	GR356II
8	340014	340298	LDBPK_080790	Amastin-like protein	3	GR356II
9	66591	68165	LDBPK_090160	Putative uncharacterized protein	3	GR356II
9	69465	69839	LDBPK_090170	Microtubule associated protein-like protein	3	GR356II
9	71060	71464	LDBPK_090180	ATG8/AUT7/APG8/PAZ2	3	GR356II
9	72520	72552	LDBPK_090190	Microtubule associated protein-like protein (Fragment)	3	GR356II
9	74109	74477	LDBPK_090200	Microtubule associated protein-like protein	3	GR356II
10	162754	163668	LDBPK_100390	Folate/biopterin transporter	3	GR356II
10	170745	171935	LDBPK_100400	Folate/biopterin transporter	3	GR356II
10	178404	179465	LDBPK_100410	Folate/biopterin transporter	3	GR356II
14	250499	251383	LDBPK_140700	Fatty acid elongase	4	GR356II
18	287537	288460	LDBPK_180700	Citrate synthase (Fragment)	3	GR356II
19	231925	233097	LDBPK_190570	Putative uncharacterized protein (Fragment)	3	GR356II
21	661627	662940	LDBPK_211850	Putative uncharacterized protein	3	GR356II
22	555165	555614	LDBPK_221260	Centrin	3	GR356II
22	558326	559210	LDBPK_221270	Aquaporin	3	GR356II
22	560214	560549	LDBPK_221280	Peptidyl-prolyl cis-trans isomerase	3	GR356II
23	96936	98192	LDBPK_230300	Argininosuccinate synthase	4	GR356II
24	155052	157034	LDBPK_240440	Hypothetical predicted transmembrane protein (Fragment)	3	GR356II
24	158357	158725	LDBPK_240450	Putative uncharacterized protein	3	GR356II
24	161201	161887	LDBPK_240460	Hypothetical predicted transmembrane protein (Fragment)	3	GR356II
27	318748	319674	LDBPK_270780	Putative uncharacterized protein	3	GR356II
28	1072168	1072533	LDBPK_282950	Heat-shock protein hsp70	3	GR356II
28	1074624	1074698	LDBPK_282960	Heat-shock protein hsp70	3	GR356II
29	713073	714938	LDBPK_291610	Putative uncharacterized protein	4	GR356II
29	715106	715465	LDBPK_291620	Putative uncharacterized protein (Fragment)	4	GR356II
29	721206	721553	LDBPK_291630	Putative uncharacterized protein	4	GR356II
29	961447	962877	LDBPK_292240	Putative uncharacterized protein	3	GR356II
29	1097019	1097486	LDBPK_292560	Heat shock protein 20	3	GR356II
29	1100676	1100873	LDBPK_292570	60S ribosomal protein L13	3	GR356II
29	1102714	1102899	LDBPK_292580	60S ribosomal protein L13	3	GR356II
30	498149	498673	LDBPK_301480	Ama1 protein	3	GR356II
30	498977	499222	LDBPK_301490	Ama1 protein	3	GR356II
31	522936	524792	LDBPK_311300	ATP-binding cassette protein subfamily C	3	GR356II
31	865260	866147	LDBPK_311850	Amino acid permease (Fragment)	3	GR356II
31	873599	873946	LDBPK_311860	Amino acid permease (Fragment)	3	GR356II
31	1135273	1137138	LDBPK_312330	Aminopeptidase	3	GR356II
31	1138936	1140324	LDBPK_312340	Putative uncharacterized protein	3	GR356II
31	1143541	1144089	LDBPK_312350	ADP-ribosylation factor	3	GR356II
34	353914	354366	LDBPK_340840	Serine/threonine-protein phosphatase (Fragment)	3	GR356II
34	358945	359430	LDBPK_340850	Serine/threonine-protein phosphatase (Fragment)	3	GR356II
34	1155486	1155740	LDBPK_342650	Amastin-like surface protein	4	GR356II
34	1160118	1160435	LDBPK_342660	Amastin-like surface protein	4	GR356II
36	1571715	1572758	LDBPK_364270	Phosphoglycerate mutase family member 5	3	GR356II
8	338970	339551	LDBPK_080780	Amastin-like protein	3	GR356III
8	340014	340298	LDBPK_080790	Amastin-like protein	3	GR356III
9	66591	68165	LDBPK_090160	Putative uncharacterized protein	3	GR356III
9	69465	69839	LDBPK_090170	Microtubule associated protein-like protein	3	GR356III
9	71060	71464	LDBPK_090180	ATG8/AUT7/APG8/PAZ2	3	GR356III
9	72520	72552	LDBPK_090190	Microtubule associated protein-like protein (Fragment)	3	GR356III
9	74109	74477	LDBPK_090200	Microtubule associated protein-like protein	3	GR356III
10	162754	163668	LDBPK_100390	Folate/biopterin transporter	3	GR356III
10	170745	171935	LDBPK_100400	Folate/biopterin transporter	3	GR356III
10	178404	179465	LDBPK_100410	Folate/biopterin transporter	3	GR356III
14	250499	251383	LDBPK_140700	Fatty acid elongase	4	GR356III
14	493765	494421	LDBPK_141190	Kinesin K39	3	GR356III
18	287537	288460	LDBPK_180700	Citrate synthase (Fragment)	3	GR356III
19	231925	233097	LDBPK_190570	Putative uncharacterized protein (Fragment)	3	GR356III
21	661627	662940	LDBPK_211850	Putative uncharacterized protein	3	GR356III
22	555165	555614	LDBPK_221260	Centrin	3	GR356III
22	558326	559210	LDBPK_221270	Aquaporin	3	GR356III
22	560214	560549	LDBPK_221280	Peptidyl-prolyl cis-trans isomerase	3	GR356III
23	96936	98192	LDBPK_230300	Argininosuccinate synthase	4	GR356III
24	161201	161887	LDBPK_240460	Hypothetical predicted transmembrane protein (Fragment)	3	GR356III
27	318748	319674	LDBPK_270780	Putative uncharacterized protein	3	GR356III
29	713073	714938	LDBPK_291610	Putative uncharacterized protein	4	GR356III
29	715106	715465	LDBPK_291620	Putative uncharacterized protein (Fragment)	4	GR356III
29	721206	721553	LDBPK_291630	Putative uncharacterized protein	4	GR356III
29	961447	962877	LDBPK_292240	Putative uncharacterized protein	3	GR356III
29	1097019	1097486	LDBPK_292560	Heat shock protein 20	3	GR356III
29	1100676	1100873	LDBPK_292570	60S ribosomal protein L13	3	GR356III
29	1102714	1102899	LDBPK_292580	60S ribosomal protein L13	3	GR356III
30	498149	498673	LDBPK_301480	Ama1 protein	3	GR356III
30	498977	499222	LDBPK_301490	Ama1 protein	3	GR356III
31	522936	524792	LDBPK_311300	ATP-binding cassette protein subfamily C	3	GR356III
31	865260	866147	LDBPK_311850	Amino acid permease (Fragment)	3	GR356III
31	873599	873946	LDBPK_311860	Amino acid permease (Fragment)	3	GR356III
31	1135273	1137138	LDBPK_312330	Aminopeptidase	3	GR356III
31	1138936	1140324	LDBPK_312340	Putative uncharacterized protein	3	GR356III
31	1143541	1144089	LDBPK_312350	ADP-ribosylation factor	3	GR356III
34	353914	354366	LDBPK_340840	Serine/threonine-protein phosphatase (Fragment)	3	GR356III
34	358945	359430	LDBPK_340850	Serine/threonine-protein phosphatase (Fragment)	3	GR356III
34	1155486	1155740	LDBPK_342650	Amastin-like surface protein	4	GR356III
34	1160118	1160435	LDBPK_342660	Amastin-like surface protein	4	GR356III
36	1571715	1572758	LDBPK_364270	Phosphoglycerate mutase family member 5	3	GR356III
8	338970	339551	LDBPK_080780	Amastin-like protein	3	GR356IV
8	340014	340298	LDBPK_080790	Amastin-like protein	3	GR356IV
9	66591	68165	LDBPK_090160	Putative uncharacterized protein	3	GR356IV
9	69465	69839	LDBPK_090170	Microtubule associated protein-like protein	3	GR356IV
9	71060	71464	LDBPK_090180	ATG8/AUT7/APG8/PAZ2	3	GR356IV
9	72520	72552	LDBPK_090190	Microtubule associated protein-like protein (Fragment)	3	GR356IV
9	74109	74477	LDBPK_090200	Microtubule associated protein-like protein	3	GR356IV
10	162754	163668	LDBPK_100390	Folate/biopterin transporter	3	GR356IV
10	170745	171935	LDBPK_100400	Folate/biopterin transporter	3	GR356IV
10	178404	179465	LDBPK_100410	Folate/biopterin transporter	3	GR356IV
14	250499	251383	LDBPK_140700	Fatty acid elongase	4	GR356IV
18	287537	288460	LDBPK_180700	Citrate synthase (Fragment)	3	GR356IV
19	231925	233097	LDBPK_190570	Putative uncharacterized protein (Fragment)	3	GR356IV
19	626399	627463	LDBPK_191460	Cysteine peptidase A (CBA)	3	GR356IV
21	661627	662940	LDBPK_211850	Putative uncharacterized protein	3	GR356IV
22	555165	555614	LDBPK_221260	Centrin	3	GR356IV
22	558326	559210	LDBPK_221270	Aquaporin	3	GR356IV
22	560214	560549	LDBPK_221280	Peptidyl-prolyl cis-trans isomerase	3	GR356IV
23	96936	98192	LDBPK_230300	Argininosuccinate synthase	4	GR356IV
24	161201	161887	LDBPK_240460	Hypothetical predicted transmembrane protein (Fragment)	3	GR356IV
27	318748	319674	LDBPK_270780	Putative uncharacterized protein	3	GR356IV
29	713073	714938	LDBPK_291610	Putative uncharacterized protein	4	GR356IV
29	715106	715465	LDBPK_291620	Putative uncharacterized protein (Fragment)	4	GR356IV
29	721206	721553	LDBPK_291630	Putative uncharacterized protein	4	GR356IV
29	961447	962877	LDBPK_292240	Putative uncharacterized protein	3	GR356IV
29	1097019	1097486	LDBPK_292560	Heat shock protein 20	3	GR356IV
29	1100676	1100873	LDBPK_292570	60S ribosomal protein L13	3	GR356IV
29	1102714	1102899	LDBPK_292580	60S ribosomal protein L13	3	GR356IV
30	498149	498673	LDBPK_301480	Ama1 protein	3	GR356IV
30	498977	499222	LDBPK_301490	Ama1 protein	3	GR356IV
31	522936	524792	LDBPK_311300	ATP-binding cassette protein subfamily C	3	GR356IV
31	865260	866147	LDBPK_311850	Amino acid permease (Fragment)	3	GR356IV
31	873599	873946	LDBPK_311860	Amino acid permease (Fragment)	3	GR356IV
31	1135273	1137138	LDBPK_312330	Aminopeptidase	3	GR356IV
31	1138936	1140324	LDBPK_312340	Putative uncharacterized protein	3	GR356IV
31	1143541	1144089	LDBPK_312350	ADP-ribosylation factor	3	GR356IV
34	353914	354366	LDBPK_340840	Serine/threonine-protein phosphatase (Fragment)	3	GR356IV
34	358945	359430	LDBPK_340850	Serine/threonine-protein phosphatase (Fragment)	3	GR356IV
34	1155486	1155740	LDBPK_342650	Amastin-like surface protein	4	GR356IV
34	1160118	1160435	LDBPK_342660	Amastin-like surface protein	4	GR356IV
36	1571715	1572758	LDBPK_364270	Phosphoglycerate mutase family member 5	3	GR356IV
8	338970	339551	LDBPK_080780	Amastin-like protein	1	GR356V
8	340014	340298	LDBPK_080790	Amastin-like protein	1	GR356V
10	162754	163668	LDBPK_100390	Folate/biopterin transporter	3	GR356V
10	170745	171935	LDBPK_100400	Folate/biopterin transporter	3	GR356V
10	178404	179465	LDBPK_100410	Folate/biopterin transporter	3	GR356V
14	132416	132526	LDBPK_140390	Putative uncharacterized protein	1	GR356V
14	135623	136555	LDBPK_140400	Putative uncharacterized protein	1	GR356V
17	57178	59232	LDBPK_170140	Receptor-type adenylate cyclase b (Fragment)	1	GR356V
17	61864	62145	LDBPK_170150	Receptor-type adenylate cyclase b	1	GR356V
18	554875	557178	LDBPK_181320	Putative uncharacterized protein	3	GR356V
22	666638	666850	LDBPK_221550	Putative uncharacterized protein	3	GR356V
29	715106	715465	LDBPK_291620	Putative uncharacterized protein (Fragment)	3	GR356V
29	721206	721553	LDBPK_291630	Putative uncharacterized protein	3	GR356V
34	728956	729774	LDBPK_341700	Amastin-like surface protein	1	GR356V
4	57483	58529	LDBPK_040170	Surface antigen-like protein (Fragment)	3	GR356VI
4	60774	62483	LDBPK_040180	Surface antigen-like protein (Fragment)	3	GR356VI
4	63975	64523	LDBPK_040190	Surface antigen-like protein	3	GR356VI
8	338970	339551	LDBPK_080780	Amastin-like protein	3	GR356VI
8	340014	340298	LDBPK_080790	Amastin-like protein	3	GR356VI
9	66591	68165	LDBPK_090160	Putative uncharacterized protein	3	GR356VI
9	69465	69839	LDBPK_090170	Microtubule associated protein-like protein	3	GR356VI
9	71060	71464	LDBPK_090180	ATG8/AUT7/APG8/PAZ2	3	GR356VI
9	72520	72552	LDBPK_090190	Microtubule associated protein-like protein (Fragment)	3	GR356VI
9	74109	74477	LDBPK_090200	Microtubule associated protein-like protein	3	GR356VI
10	162754	163668	LDBPK_100390	Folate/biopterin transporter	3	GR356VI
10	170745	171935	LDBPK_100400	Folate/biopterin transporter	3	GR356VI
10	178404	179465	LDBPK_100410	Folate/biopterin transporter	3	GR356VI
14	250499	251383	LDBPK_140700	Fatty acid elongase	4	GR356VI
18	287537	288460	LDBPK_180700	Citrate synthase (Fragment)	3	GR356VI
19	231925	233097	LDBPK_190570	Putative uncharacterized protein (Fragment)	3	GR356VI
21	661627	662940	LDBPK_211850	Putative uncharacterized protein	3	GR356VI
22	555165	555614	LDBPK_221260	Centrin	3	GR356VI
22	558326	559210	LDBPK_221270	Aquaporin	3	GR356VI
22	560214	560549	LDBPK_221280	Peptidyl-prolyl cis-trans isomerase	3	GR356VI
23	96936	98192	LDBPK_230300	Argininosuccinate synthase	4	GR356VI
24	161201	161887	LDBPK_240460	Hypothetical predicted transmembrane protein (Fragment)	3	GR356VI
27	318748	319674	LDBPK_270780	Putative uncharacterized protein	3	GR356VI
29	713073	714938	LDBPK_291610	Putative uncharacterized protein	4	GR356VI
29	715106	715465	LDBPK_291620	Putative uncharacterized protein (Fragment)	4	GR356VI
29	721206	721553	LDBPK_291630	Putative uncharacterized protein	4	GR356VI
29	1097019	1097486	LDBPK_292560	Heat shock protein 20	3	GR356VI
29	1100676	1100873	LDBPK_292570	60S ribosomal protein L13	3	GR356VI
29	1102714	1102899	LDBPK_292580	60S ribosomal protein L13	3	GR356VI
30	498149	498673	LDBPK_301480	Ama1 protein	3	GR356VI
30	498977	499222	LDBPK_301490	Ama1 protein	3	GR356VI
31	522936	524792	LDBPK_311300	ATP-binding cassette protein subfamily C	3	GR356VI
31	865260	866147	LDBPK_311850	Amino acid permease (Fragment)	3	GR356VI
31	873599	873946	LDBPK_311860	Amino acid permease (Fragment)	3	GR356VI
31	1135273	1137138	LDBPK_312330	Aminopeptidase	3	GR356VI
31	1138936	1140324	LDBPK_312340	Putative uncharacterized protein	3	GR356VI
31	1143541	1144089	LDBPK_312350	ADP-ribosylation factor	3	GR356VI
34	353914	354366	LDBPK_340840	Serine/threonine-protein phosphatase (Fragment)	3	GR356VI
34	358945	359430	LDBPK_340850	Serine/threonine-protein phosphatase (Fragment)	3	GR356VI
34	425622	426134	LDBPK_341020	Amastin-like surface protein	4	GR356VI
34	1155486	1155740	LDBPK_342650	Amastin-like surface protein	4	GR356VI
34	1160118	1160435	LDBPK_342660	Amastin-like surface protein	4	GR356VI
36	1571715	1572758	LDBPK_364270	Phosphoglycerate mutase family member 5	3	GR356VI
6	35984	36377	LDBPK_060080	ATP-binding cassette protein subfamily G	3	GR356VII
6	42258	42698	LDBPK_060090	ATP-binding cassette protein subfamily G	3	GR356VII
6	44108	44215	LDBPK_060100	ATP-binding cassette protein subfamily G	3	GR356VII
8	338970	339551	LDBPK_080780	Amastin-like protein	3	GR356VII
8	340014	340298	LDBPK_080790	Amastin-like protein	3	GR356VII
9	66591	68165	LDBPK_090160	Putative uncharacterized protein	3	GR356VII
9	69465	69839	LDBPK_090170	Microtubule associated protein-like protein	3	GR356VII
9	71060	71464	LDBPK_090180	ATG8/AUT7/APG8/PAZ2	3	GR356VII
9	72520	72552	LDBPK_090190	Microtubule associated protein-like protein (Fragment)	3	GR356VII
9	74109	74477	LDBPK_090200	Microtubule associated protein-like protein	3	GR356VII
10	162754	163668	LDBPK_100390	Folate/biopterin transporter	3	GR356VII
10	170745	171935	LDBPK_100400	Folate/biopterin transporter	3	GR356VII
10	178404	179465	LDBPK_100410	Folate/biopterin transporter	3	GR356VII
14	250499	251383	LDBPK_140700	Fatty acid elongase	4	GR356VII
18	287537	288460	LDBPK_180700	Citrate synthase (Fragment)	3	GR356VII
19	231925	233097	LDBPK_190570	Putative uncharacterized protein (Fragment)	3	GR356VII
21	661627	662940	LDBPK_211850	Putative uncharacterized protein	3	GR356VII
22	555165	555614	LDBPK_221260	Centrin	3	GR356VII
22	558326	559210	LDBPK_221270	Aquaporin	3	GR356VII
22	560214	560549	LDBPK_221280	Peptidyl-prolyl cis-trans isomerase	3	GR356VII
23	96936	98192	LDBPK_230300	Argininosuccinate synthase	4	GR356VII
24	161201	161887	LDBPK_240460	Hypothetical predicted transmembrane protein (Fragment)	3	GR356VII
27	318748	319674	LDBPK_270780	Putative uncharacterized protein	3	GR356VII
28	1072168	1072533	LDBPK_282950	Heat-shock protein hsp70	3	GR356VII
28	1074624	1074698	LDBPK_282960	Heat-shock protein hsp70	3	GR356VII
29	713073	714938	LDBPK_291610	Putative uncharacterized protein	4	GR356VII
29	715106	715465	LDBPK_291620	Putative uncharacterized protein (Fragment)	4	GR356VII
29	721206	721553	LDBPK_291630	Putative uncharacterized protein	4	GR356VII
29	961447	962877	LDBPK_292240	Putative uncharacterized protein	3	GR356VII
29	1097019	1097486	LDBPK_292560	Heat shock protein 20	3	GR356VII
29	1100676	1100873	LDBPK_292570	60S ribosomal protein L13	3	GR356VII
29	1102714	1102899	LDBPK_292580	60S ribosomal protein L13	3	GR356VII
30	498149	498673	LDBPK_301480	Ama1 protein	3	GR356VII
30	498977	499222	LDBPK_301490	Ama1 protein	3	GR356VII
31	522936	524792	LDBPK_311300	ATP-binding cassette protein subfamily C	3	GR356VII
31	865260	866147	LDBPK_311850	Amino acid permease (Fragment)	3	GR356VII
31	873599	873946	LDBPK_311860	Amino acid permease (Fragment)	3	GR356VII
31	1135273	1137138	LDBPK_312330	Aminopeptidase	3	GR356VII
31	1138936	1140324	LDBPK_312340	Putative uncharacterized protein	3	GR356VII
31	1143541	1144089	LDBPK_312350	ADP-ribosylation factor	3	GR356VII
34	353914	354366	LDBPK_340840	Serine/threonine-protein phosphatase (Fragment)	3	GR356VII
34	358945	359430	LDBPK_340850	Serine/threonine-protein phosphatase (Fragment)	3	GR356VII
34	1155486	1155740	LDBPK_342650	Amastin-like surface protein	4	GR356VII
34	1160118	1160435	LDBPK_342660	Amastin-like surface protein	4	GR356VII
36	1571715	1572758	LDBPK_364270	Phosphoglycerate mutase family member 5	3	GR356VII
8	338970	339551	LDBPK_080780	Amastin-like protein	1	GR356VIII
8	340014	340298	LDBPK_080790	Amastin-like protein	1	GR356VIII
10	162754	163668	LDBPK_100390	Folate/biopterin transporter	3	GR356VIII
10	170745	171935	LDBPK_100400	Folate/biopterin transporter	3	GR356VIII
10	178404	179465	LDBPK_100410	Folate/biopterin transporter	3	GR356VIII
14	132416	132526	LDBPK_140390	Putative uncharacterized protein	1	GR356VIII
14	135623	136555	LDBPK_140400	Putative uncharacterized protein	1	GR356VIII
17	57178	59232	LDBPK_170140	Receptor-type adenylate cyclase b (Fragment)	1	GR356VIII
17	61864	62145	LDBPK_170150	Receptor-type adenylate cyclase b	1	GR356VIII
22	666638	666850	LDBPK_221550	Putative uncharacterized protein	3	GR356VIII
29	715106	715465	LDBPK_291620	Putative uncharacterized protein (Fragment)	3	GR356VIII
29	721206	721553	LDBPK_291630	Putative uncharacterized protein	3	GR356VIII
34	728956	729774	LDBPK_341700	Amastin-like surface protein	1	GR356VIII
8	338970	339551	LDBPK_080780	Amastin-like protein	1	GR356XI
8	340014	340298	LDBPK_080790	Amastin-like protein	1	GR356XI
10	162754	163668	LDBPK_100390	Folate/biopterin transporter	3	GR356XI
10	170745	171935	LDBPK_100400	Folate/biopterin transporter	3	GR356XI
10	178404	179465	LDBPK_100410	Folate/biopterin transporter	3	GR356XI
14	132416	132526	LDBPK_140390	Putative uncharacterized protein	1	GR356XI
14	135623	136555	LDBPK_140400	Putative uncharacterized protein	1	GR356XI
17	57178	59232	LDBPK_170140	Receptor-type adenylate cyclase b (Fragment)	1	GR356XI
17	61864	62145	LDBPK_170150	Receptor-type adenylate cyclase b	1	GR356XI
22	666638	666850	LDBPK_221550	Putative uncharacterized protein	3	GR356XI
29	715106	715465	LDBPK_291620	Putative uncharacterized protein (Fragment)	3	GR356XI
29	721206	721553	LDBPK_291630	Putative uncharacterized protein	3	GR356XI
34	728956	729774	LDBPK_341700	Amastin-like surface protein	1	GR356XI
8	338970	339551	LDBPK_080780	Amastin-like protein	1	GR363SKI
8	340014	340298	LDBPK_080790	Amastin-like protein	1	GR363SKI
22	666638	666850	LDBPK_221550	Putative uncharacterized protein	3	GR363SKI
30	572069	575023	LDBPK_301630	Ferric reductase	4	GR363SKI
30	578031	580121	LDBPK_301640	Putative uncharacterized protein	4	GR363SKI
30	581219	581605	LDBPK_301650	Putative uncharacterized protein	4	GR363SKI
30	582895	583347	LDBPK_301660	Putative uncharacterized protein	4	GR363SKI
34	728956	729774	LDBPK_341700	Amastin-like surface protein	1	GR363SKI
8	338970	339551	LDBPK_080780	Amastin-like protein	1	GR363SKII
8	340014	340298	LDBPK_080790	Amastin-like protein	1	GR363SKII
30	572069	575023	LDBPK_301630	Ferric reductase	4	GR363SKII
30	578031	580121	LDBPK_301640	Putative uncharacterized protein	4	GR363SKII
30	581219	581605	LDBPK_301650	Putative uncharacterized protein	4	GR363SKII
30	582895	583347	LDBPK_301660	Putative uncharacterized protein	4	GR363SKII
34	728956	729774	LDBPK_341700	Amastin-like surface protein	1	GR363SKII
8	338970	339551	LDBPK_080780	Amastin-like protein	1	GR363SKX
8	340014	340298	LDBPK_080790	Amastin-like protein	1	GR363SKX
22	666638	666850	LDBPK_221550	Putative uncharacterized protein	3	GR363SKX
30	572069	575023	LDBPK_301630	Ferric reductase	4	GR363SKX
30	578031	580121	LDBPK_301640	Putative uncharacterized protein	4	GR363SKX
30	581219	581605	LDBPK_301650	Putative uncharacterized protein	4	GR363SKX
30	582895	583347	LDBPK_301660	Putative uncharacterized protein	4	GR363SKX
34	728956	729774	LDBPK_341700	Amastin-like surface protein	1	GR363SKX
8	338970	339551	LDBPK_080780	Amastin-like protein	1	GR363SPI
8	340014	340298	LDBPK_080790	Amastin-like protein	1	GR363SPI
22	666638	666850	LDBPK_221550	Putative uncharacterized protein	3	GR363SPI
30	572069	575023	LDBPK_301630	Ferric reductase	4	GR363SPI
30	578031	580121	LDBPK_301640	Putative uncharacterized protein	4	GR363SPI
30	581219	581605	LDBPK_301650	Putative uncharacterized protein	4	GR363SPI
30	582895	583347	LDBPK_301660	Putative uncharacterized protein	4	GR363SPI
34	728956	729774	LDBPK_341700	Amastin-like surface protein	1	GR363SPI
8	338970	339551	LDBPK_080780	Amastin-like protein	1	GR363SPII
8	340014	340298	LDBPK_080790	Amastin-like protein	1	GR363SPII
22	666638	666850	LDBPK_221550	Putative uncharacterized protein	3	GR363SPII
30	572069	575023	LDBPK_301630	Ferric reductase	4	GR363SPII
30	578031	580121	LDBPK_301640	Putative uncharacterized protein	4	GR363SPII
30	581219	581605	LDBPK_301650	Putative uncharacterized protein	4	GR363SPII
30	582895	583347	LDBPK_301660	Putative uncharacterized protein	4	GR363SPII
34	728956	729774	LDBPK_341700	Amastin-like surface protein	1	GR363SPII
8	338970	339551	LDBPK_080780	Amastin-like protein	1	GR363SPX
8	340014	340298	LDBPK_080790	Amastin-like protein	1	GR363SPX
14	132416	132526	LDBPK_140390	Putative uncharacterized protein	1	GR363SPX
14	135623	136555	LDBPK_140400	Putative uncharacterized protein	1	GR363SPX
22	666638	666850	LDBPK_221550	Putative uncharacterized protein	3	GR363SPX
30	572069	575023	LDBPK_301630	Ferric reductase	4	GR363SPX
30	578031	580121	LDBPK_301640	Putative uncharacterized protein	4	GR363SPX
30	581219	581605	LDBPK_301650	Putative uncharacterized protein	4	GR363SPX
30	582895	583347	LDBPK_301660	Putative uncharacterized protein	4	GR363SPX
34	728956	729774	LDBPK_341700	Amastin-like surface protein	1	GR363SPX
4	405703	406773	LDBPK_041050	Acyltransferase-like protein	3	GR364SK
4	407935	409392	LDBPK_041060	Putative uncharacterized protein	3	GR364SK
10	162754	163668	LDBPK_100390	Folate/biopterin transporter	4	GR364SK
10	170745	171935	LDBPK_100400	Folate/biopterin transporter	4	GR364SK
10	178404	179465	LDBPK_100410	Folate/biopterin transporter	4	GR364SK
14	250499	251383	LDBPK_140700	Fatty acid elongase	3	GR364SK
19	727135	727818	LDBPK_191690	Putative uncharacterized protein (Fragment)	3	GR364SK
20	701458	703284	LDBPK_201600	Putative uncharacterized protein	3	GR364SK
20	704275	704916	LDBPK_201610	Phosphatase-like protein	3	GR364SK
20	708283	709494	LDBPK_201630	Putative uncharacterized protein	3	GR364SK
20	710391	711341	LDBPK_201640	Ribosome biogenesis protein	3	GR364SK
20	712213	716052	LDBPK_201650	Separin	3	GR364SK
20	717271	718119	LDBPK_201660	Soluble n-ethylmaleimide sensitive factor	3	GR364SK
20	719032	719856	LDBPK_201670	Putative uncharacterized protein	3	GR364SK
20	720460	722271	LDBPK_201680	Putative uncharacterized protein	3	GR364SK
20	722999	723736	LDBPK_201690	Putative uncharacterized protein	3	GR364SK
20	724952	726208	LDBPK_201700	Mitochondrial RNA ligase 2	3	GR364SK
20	726932	727834	LDBPK_201710	Putative uncharacterized protein	3	GR364SK
29	1197704	1198804	LDBPK_292840	Putative uncharacterized protein	4	GR364SK
29	1199946	1200917	LDBPK_292850	Actin-like protein	4	GR364SK
29	1201683	1201904	LDBPK_292860	Putative uncharacterized protein	4	GR364SK
29	1202809	1204515	LDBPK_292870	Putative uncharacterized protein	4	GR364SK
29	1205493	1206107	LDBPK_292880	Putative uncharacterized protein	4	GR364SK
29	1206719	1207594	LDBPK_292890	Mitochondrial carrier protein-like protein	4	GR364SK
29	1210819	1211397	LDBPK_292900	Putative uncharacterized protein	4	GR364SK
29	1214346	1215347	LDBPK_292910	Inosine-adenosine-guanosine-nucleoside hydrolase	4	GR364SK
29	1218526	1220736	LDBPK_292920	Ribonuclease inhibitor-like protein	4	GR364SK
29	1221489	1222223	LDBPK_292930	Putative uncharacterized protein	4	GR364SK
29	1223328	1223960	LDBPK_292940	Putative uncharacterized protein	4	GR364SK
29	1228575	1229516	LDBPK_292950	Putative uncharacterized protein	4	GR364SK
29	1229935	1230312	LDBPK_292960	Putative uncharacterized protein	4	GR364SK
29	1231945	1233102	LDBPK_292980	Putative uncharacterized protein	4	GR364SK
29	1237184	1237369	LDBPK_292990	Putative uncharacterized protein	4	GR364SK
30	572069	575023	LDBPK_301630	Ferric reductase	4	GR364SK
30	578031	580121	LDBPK_301640	Putative uncharacterized protein	4	GR364SK
30	581219	581605	LDBPK_301650	Putative uncharacterized protein	4	GR364SK
30	582895	583347	LDBPK_301660	Putative uncharacterized protein	4	GR364SK
31	104623	104934	LDBPK_310360	Amino acid transporter aATP11	1	GR364SK
34	728956	729774	LDBPK_341700	Amastin-like surface protein	1	GR364SK
34	1155486	1155740	LDBPK_342650	Amastin-like surface protein	4	GR364SK
34	1160118	1160435	LDBPK_342660	Amastin-like surface protein	4	GR364SK
4	405703	406773	LDBPK_041050	Acyltransferase-like protein	3	GR364SKI
4	407935	409392	LDBPK_041060	Putative uncharacterized protein	3	GR364SKI
8	338970	339551	LDBPK_080780	Amastin-like protein	1	GR364SKI
8	340014	340298	LDBPK_080790	Amastin-like protein	1	GR364SKI
10	162754	163668	LDBPK_100390	Folate/biopterin transporter	4	GR364SKI
10	170745	171935	LDBPK_100400	Folate/biopterin transporter	4	GR364SKI
10	178404	179465	LDBPK_100410	Folate/biopterin transporter	4	GR364SKI
20	708283	709494	LDBPK_201630	Putative uncharacterized protein	3	GR364SKI
20	710391	711341	LDBPK_201640	Ribosome biogenesis protein	3	GR364SKI
20	712213	716052	LDBPK_201650	Separin	3	GR364SKI
20	717271	718119	LDBPK_201660	Soluble n-ethylmaleimide sensitive factor	3	GR364SKI
20	719032	719856	LDBPK_201670	Putative uncharacterized protein	3	GR364SKI
20	720460	722271	LDBPK_201680	Putative uncharacterized protein	3	GR364SKI
20	722999	723736	LDBPK_201690	Putative uncharacterized protein	3	GR364SKI
20	724952	726208	LDBPK_201700	Mitochondrial RNA ligase 2	3	GR364SKI
20	726932	727834	LDBPK_201710	Putative uncharacterized protein	3	GR364SKI
22	666638	666850	LDBPK_221550	Putative uncharacterized protein	3	GR364SKI
29	715106	715465	LDBPK_291620	Putative uncharacterized protein (Fragment)	3	GR364SKI
29	721206	721553	LDBPK_291630	Putative uncharacterized protein	3	GR364SKI
30	572069	575023	LDBPK_301630	Ferric reductase	3	GR364SKI
31	104623	104934	LDBPK_310360	Amino acid transporter aATP11	1	GR364SKI
34	728956	729774	LDBPK_341700	Amastin-like surface protein	1	GR364SKI
4	51206	52510	LDBPK_040150	Putative uncharacterized protein	3	GR364SKII
4	53006	54583	LDBPK_040160	Putative uncharacterized protein	3	GR364SKII
4	57483	58529	LDBPK_040170	Surface antigen-like protein (Fragment)	3	GR364SKII
9	369224	369463	LDBPK_090950	Polyubiquitin (Fragment)	3	GR364SKII
9	370617	371177	LDBPK_090960	Ef-hand protein 5	3	GR364SKII
9	372847	373296	LDBPK_090970	Calmodulin	3	GR364SKII
9	447763	448602	LDBPK_091130	Eukaryotic translation initiation factor 2 subunit	4	GR364SKII
9	452959	453159	LDBPK_091140	Translation initiation factor EIF-2B gamma subunit	4	GR364SKII
9	454006	454773	LDBPK_091160	Putative uncharacterized protein	4	GR364SKII
10	162754	163668	LDBPK_100390	Folate/biopterin transporter	1	GR364SKII
10	170745	171935	LDBPK_100400	Folate/biopterin transporter	1	GR364SKII
10	178404	179465	LDBPK_100410	Folate/biopterin transporter	1	GR364SKII
10	205475	205726	LDBPK_100480	Putative uncharacterized protein	3	GR364SKII
10	213241	213495	LDBPK_100510	GP63	3	GR364SKII
10	220588	220848	LDBPK_100520	GP63	3	GR364SKII
10	224849	225082	LDBPK_100521	Putative uncharacterized protein	3	GR364SKII
11	501882	502019	LDBPK_111220	ABC transporter-like protein (Fragment)	1	GR364SKII
11	505709	509374	LDBPK_111230	ATP-binding cassette protein subfamily A	1	GR364SKII
14	250499	251383	LDBPK_140700	Fatty acid elongase	3	GR364SKII
17	57178	59232	LDBPK_170140	Receptor-type adenylate cyclase b (Fragment)	3	GR364SKII
17	61864	62145	LDBPK_170150	Receptor-type adenylate cyclase b	3	GR364SKII
18	287537	288460	LDBPK_180700	Citrate synthase (Fragment)	3	GR364SKII
19	231925	233097	LDBPK_190570	Putative uncharacterized protein (Fragment)	3	GR364SKII
19	572975	574054	LDBPK_191340	Glycerol uptake protein	3	GR364SKII
19	572975	574051	LDBPK_191350	Glycerol uptake protein	3	GR364SKII
21	661627	662940	LDBPK_211850	Putative uncharacterized protein	3	GR364SKII
22	666638	666850	LDBPK_221550	Putative uncharacterized protein	1	GR364SKII
23	435473	436495	LDBPK_231050	Quinone oxidoreductase-like protein	3	GR364SKII
23	508143	508202	LDBPK_231240	Hydrophilic acylated surface protein a (Fragment)	3	GR364SKII
24	161201	161887	LDBPK_240460	Hypothetical predicted transmembrane protein (Fragment)	3	GR364SKII
27	798359	799840	LDBPK_271940	D-lactate dehydrogenase-like protein	1	GR364SKII
27	803591	804793	LDBPK_271950	Branched-chain amino acid aminotransferase	1	GR364SKII
28	756654	756995	LDBPK_282040	Putative uncharacterized protein	3	GR364SKII
28	760309	761703	LDBPK_282050	Zinc transporter	3	GR364SKII
28	1080458	1081396	LDBPK_282970	Activated protein kinase c receptor (LACK)	4	GR364SKII
28	1082446	1084230	LDBPK_282980	Gamma-tubulin complex subunit	4	GR364SKII
29	1097019	1097486	LDBPK_292560	Heat shock protein 20	3	GR364SKII
29	1100676	1100873	LDBPK_292570	60S ribosomal protein L13	3	GR364SKII
29	1102714	1102899	LDBPK_292580	60S ribosomal protein L13	3	GR364SKII
30	498149	498673	LDBPK_301480	Ama1 protein	3	GR364SKII
30	498977	499222	LDBPK_301490	Ama1 protein	3	GR364SKII
31	522936	524792	LDBPK_311300	ATP-binding cassette protein subfamily C	3	GR364SKII
31	670326	670781	LDBPK_311470	Putative uncharacterized protein	1	GR364SKII
31	771427	773862	LDBPK_311630	Putative uncharacterized protein	3	GR364SKII
31	774133	774948	LDBPK_311640	Diphthine synthase-like protein	3	GR364SKII
31	775217	775756	LDBPK_311650	Putative uncharacterized protein	3	GR364SKII
31	778270	778329	LDBPK_311660	Putative 3-ketoacyl-coa thiolase-like protein	3	GR364SKII
31	930420	932993	LDBPK_311920	Mannosyltransferase-like protein	3	GR364SKII
31	937932	938318	LDBPK_311930	Ubiquitin-fusion protein	3	GR364SKII
34	418436	419071	LDBPK_341010	Amastin-like surface protein	3	GR364SKII
34	425622	426134	LDBPK_341020	Amastin-like surface protein	3	GR364SKII
34	724932	725564	LDBPK_341690	Amastin-like surface protein	4	GR364SKII
34	728956	729774	LDBPK_341700	Amastin-like surface protein	4	GR364SKII
34	1155486	1155740	LDBPK_342650	Amastin-like surface protein	1	GR364SKII
34	1160118	1160435	LDBPK_342660	Amastin-like surface protein	1	GR364SKII
36	2526888	2527169	LDBPK_366740	Tartrate-sensitive acid phosphatase acp-3.2	1	GR364SKII
36	2528652	2530061	LDBPK_366750	Putative uncharacterized protein	1	GR364SKII
36	2531707	2532783	LDBPK_366760	Mitogen activated protein kinase homologue	1	GR364SKII
4	405703	406773	LDBPK_041050	Acyltransferase-like protein	3	GR364SPI
4	407935	409392	LDBPK_041060	Putative uncharacterized protein	3	GR364SPI
8	338970	339551	LDBPK_080780	Amastin-like protein	1	GR364SPI
8	340014	340298	LDBPK_080790	Amastin-like protein	1	GR364SPI
10	162754	163668	LDBPK_100390	Folate/biopterin transporter	4	GR364SPI
10	170745	171935	LDBPK_100400	Folate/biopterin transporter	4	GR364SPI
10	178404	179465	LDBPK_100410	Folate/biopterin transporter	4	GR364SPI
19	704114	704569	LDBPK_191680	Putative uncharacterized protein	3	GR364SPI
20	708283	709494	LDBPK_201630	Putative uncharacterized protein	3	GR364SPI
20	710391	711341	LDBPK_201640	Ribosome biogenesis protein	3	GR364SPI
20	712213	716052	LDBPK_201650	Separin	3	GR364SPI
20	717271	718119	LDBPK_201660	Soluble n-ethylmaleimide sensitive factor	3	GR364SPI
20	719032	719856	LDBPK_201670	Putative uncharacterized protein	3	GR364SPI
20	720460	722271	LDBPK_201680	Putative uncharacterized protein	3	GR364SPI
20	722999	723736	LDBPK_201690	Putative uncharacterized protein	3	GR364SPI
20	724952	726208	LDBPK_201700	Mitochondrial RNA ligase 2	3	GR364SPI
20	726932	727834	LDBPK_201710	Putative uncharacterized protein	3	GR364SPI
22	666638	666850	LDBPK_221550	Putative uncharacterized protein	3	GR364SPI
29	715106	715465	LDBPK_291620	Putative uncharacterized protein (Fragment)	3	GR364SPI
29	721206	721553	LDBPK_291630	Putative uncharacterized protein	3	GR364SPI
30	572069	575023	LDBPK_301630	Ferric reductase	4	GR364SPI
30	578031	580121	LDBPK_301640	Putative uncharacterized protein	4	GR364SPI
30	581219	581605	LDBPK_301650	Putative uncharacterized protein	4	GR364SPI
30	582895	583347	LDBPK_301660	Putative uncharacterized protein	4	GR364SPI
31	104623	104934	LDBPK_310360	Amino acid transporter aATP11	1	GR364SPI
34	728956	729774	LDBPK_341700	Amastin-like surface protein	1	GR364SPI
4	405703	406773	LDBPK_041050	Acyltransferase-like protein	3	GR364SPII
4	407935	409392	LDBPK_041060	Putative uncharacterized protein	3	GR364SPII
8	338970	339551	LDBPK_080780	Amastin-like protein	1	GR364SPII
8	340014	340298	LDBPK_080790	Amastin-like protein	1	GR364SPII
10	162754	163668	LDBPK_100390	Folate/biopterin transporter	4	GR364SPII
10	170745	171935	LDBPK_100400	Folate/biopterin transporter	4	GR364SPII
10	178404	179465	LDBPK_100410	Folate/biopterin transporter	4	GR364SPII
19	704114	704569	LDBPK_191680	Putative uncharacterized protein	3	GR364SPII
20	708283	709494	LDBPK_201630	Putative uncharacterized protein	3	GR364SPII
20	710391	711341	LDBPK_201640	Ribosome biogenesis protein	3	GR364SPII
20	712213	716052	LDBPK_201650	Separin	3	GR364SPII
20	717271	718119	LDBPK_201660	Soluble n-ethylmaleimide sensitive factor	3	GR364SPII
20	719032	719856	LDBPK_201670	Putative uncharacterized protein	3	GR364SPII
20	720460	722271	LDBPK_201680	Putative uncharacterized protein	3	GR364SPII
20	722999	723736	LDBPK_201690	Putative uncharacterized protein	3	GR364SPII
20	724952	726208	LDBPK_201700	Mitochondrial RNA ligase 2	3	GR364SPII
20	726932	727834	LDBPK_201710	Putative uncharacterized protein	3	GR364SPII
22	666638	666850	LDBPK_221550	Putative uncharacterized protein	3	GR364SPII
29	715106	715465	LDBPK_291620	Putative uncharacterized protein (Fragment)	3	GR364SPII
29	721206	721553	LDBPK_291630	Putative uncharacterized protein	3	GR364SPII
30	572069	575023	LDBPK_301630	Ferric reductase	4	GR364SPII
30	578031	580121	LDBPK_301640	Putative uncharacterized protein	4	GR364SPII
30	581219	581605	LDBPK_301650	Putative uncharacterized protein	4	GR364SPII
30	582895	583347	LDBPK_301660	Putative uncharacterized protein	4	GR364SPII
31	104623	104934	LDBPK_310360	Amino acid transporter aATP11	1	GR364SPII
34	728956	729774	LDBPK_341700	Amastin-like surface protein	1	GR364SPII
4	405703	406773	LDBPK_041050	Acyltransferase-like protein	3	GR364SPIII
4	407935	409392	LDBPK_041060	Putative uncharacterized protein	3	GR364SPIII
8	338970	339551	LDBPK_080780	Amastin-like protein	1	GR364SPIII
8	340014	340298	LDBPK_080790	Amastin-like protein	1	GR364SPIII
10	162754	163668	LDBPK_100390	Folate/biopterin transporter	4	GR364SPIII
10	170745	171935	LDBPK_100400	Folate/biopterin transporter	4	GR364SPIII
10	178404	179465	LDBPK_100410	Folate/biopterin transporter	4	GR364SPIII
19	704114	704569	LDBPK_191680	Putative uncharacterized protein	3	GR364SPIII
20	708283	709494	LDBPK_201630	Putative uncharacterized protein	3	GR364SPIII
20	710391	711341	LDBPK_201640	Ribosome biogenesis protein	3	GR364SPIII
20	712213	716052	LDBPK_201650	Separin	3	GR364SPIII
20	717271	718119	LDBPK_201660	Soluble n-ethylmaleimide sensitive factor	3	GR364SPIII
20	719032	719856	LDBPK_201670	Putative uncharacterized protein	3	GR364SPIII
20	720460	722271	LDBPK_201680	Putative uncharacterized protein	3	GR364SPIII
20	722999	723736	LDBPK_201690	Putative uncharacterized protein	3	GR364SPIII
20	724952	726208	LDBPK_201700	Mitochondrial RNA ligase 2	3	GR364SPIII
20	726932	727834	LDBPK_201710	Putative uncharacterized protein	3	GR364SPIII
22	666638	666850	LDBPK_221550	Putative uncharacterized protein	3	GR364SPIII
29	715106	715465	LDBPK_291620	Putative uncharacterized protein (Fragment)	3	GR364SPIII
29	721206	721553	LDBPK_291630	Putative uncharacterized protein	3	GR364SPIII
30	572069	575023	LDBPK_301630	Ferric reductase	4	GR364SPIII
30	578031	580121	LDBPK_301640	Putative uncharacterized protein	4	GR364SPIII
30	581219	581605	LDBPK_301650	Putative uncharacterized protein	4	GR364SPIII
30	582895	583347	LDBPK_301660	Putative uncharacterized protein	4	GR364SPIII
31	104623	104934	LDBPK_310360	Amino acid transporter aATP11	1	GR364SPIII
34	728956	729774	LDBPK_341700	Amastin-like surface protein	1	GR364SPIII
4	51206	52510	LDBPK_040150	Putative uncharacterized protein	3	GR379
4	53006	54583	LDBPK_040160	Putative uncharacterized protein	3	GR379
4	57483	58529	LDBPK_040170	Surface antigen-like protein (Fragment)	3	GR379
16	581504	583303	LDBPK_161510	Paraflagellar rod protein 2C	3	GR379
16	584827	585009	LDBPK_161520	Paraflagellar rod protein 2C	3	GR379
28	756654	756995	LDBPK_282040	Putative uncharacterized protein	1	GR379
28	760309	761703	LDBPK_282050	Zinc transporter	1	GR379
30	572069	575023	LDBPK_301630	Ferric reductase	4	GR379
30	578031	580121	LDBPK_301640	Putative uncharacterized protein	4	GR379
30	581219	581605	LDBPK_301650	Putative uncharacterized protein	4	GR379
30	582895	583347	LDBPK_301660	Putative uncharacterized protein	4	GR379
32	1446816	1447142	LDBPK_323810	3-hydroxyisobutyryl-coenzyme a hydrolase-like protein	3	GR379
32	1450978	1452027	LDBPK_323820	3-hydroxyisobutyryl-coenzyme a hydrolase-like protein	3	GR379
32	1453479	1454594	LDBPK_323830	Enoyl-CoA hydratase/isomerase family protein	3	GR379
34	728956	729774	LDBPK_341700	Amastin-like surface protein	1	GR379
34	1160118	1160435	LDBPK_342660	Amastin-like surface protein	3	GR379
36	2526888	2527169	LDBPK_366740	Tartrate-sensitive acid phosphatase acp-3.2	3	GR379
36	2528652	2530061	LDBPK_366750	Putative uncharacterized protein	3	GR379
36	2531707	2532783	LDBPK_366760	Mitogen activated protein kinase homologue	3	GR379
2	69113	70144	LDBPK_020140	Phosphoglycan beta 1	3	GR383I
2	76240	76944	LDBPK_020150	Phosphoglycan beta 1	3	GR383I
2	81476	81679	LDBPK_020160	Phosphoglycan beta 1	3	GR383I
8	338970	339551	LDBPK_080780	Amastin-like protein	1	GR383I
8	340014	340298	LDBPK_080790	Amastin-like protein	1	GR383I
17	57178	59232	LDBPK_170140	Receptor-type adenylate cyclase b (Fragment)	1	GR383I
17	61864	62145	LDBPK_170150	Receptor-type adenylate cyclase b	1	GR383I
22	666638	666850	LDBPK_221550	Putative uncharacterized protein	3	GR383I
28	756654	756995	LDBPK_282040	Putative uncharacterized protein	1	GR383I
28	760309	761703	LDBPK_282050	Zinc transporter	1	GR383I
29	715106	715465	LDBPK_291620	Putative uncharacterized protein (Fragment)	3	GR383I
29	721206	721553	LDBPK_291630	Putative uncharacterized protein	3	GR383I
30	572069	575023	LDBPK_301630	Ferric reductase	4	GR383I
30	578031	580121	LDBPK_301640	Putative uncharacterized protein	4	GR383I
30	581219	581605	LDBPK_301650	Putative uncharacterized protein	4	GR383I
30	582895	583347	LDBPK_301660	Putative uncharacterized protein	4	GR383I
34	728956	729774	LDBPK_341700	Amastin-like surface protein	1	GR383I
35	1895864	1896634	LDBPK_354900	Putative uncharacterized protein	5	GR383I
35	1900105	1900857	LDBPK_354910	Proteasome subunit alpha type	5	GR383I
35	1902480	1903529	LDBPK_354920	Putative uncharacterized protein	5	GR383I
35	1904946	1907948	LDBPK_354930	Putative uncharacterized protein	5	GR383I
35	1909105	1910253	LDBPK_354940	Putative uncharacterized protein	5	GR383I
35	1911880	1912743	LDBPK_354950	RAD51/dmc1 protein	5	GR383I
35	1913753	1914214	LDBPK_354960	Putative uncharacterized protein	5	GR383I
35	1915319	1918045	LDBPK_354970	DNA replication factor	5	GR383I
35	1921377	1923554	LDBPK_354980	Tubulin tyrosine ligase	5	GR383I
35	1924929	1925546	LDBPK_354990	Putative uncharacterized protein	5	GR383I
35	1931319	1934417	LDBPK_355000	Putative uncharacterized protein	5	GR383I
35	1938572	1939096	LDBPK_355010	Putative uncharacterized protein	5	GR383I
35	1940119	1941147	LDBPK_355020	Putative uncharacterized protein	5	GR383I
35	1944580	1945737	LDBPK_355030	Inositol phosphorylceramide synthase	5	GR383I
35	1949491	1950333	LDBPK_355040	Putative uncharacterized protein	5	GR383I
35	1960665	1961444	LDBPK_355050	Putative uncharacterized protein	5	GR383I
35	1963273	1964436	LDBPK_355060	Diacylglycerol kinase-like protein	5	GR383I
35	1965176	1966393	LDBPK_355070	Amino acid permease	5	GR383I
35	1969234	1989111	LDBPK_355080	Putative uncharacterized protein	5	GR383I
35	2002744	2003823	LDBPK_355090	Putative uncharacterized protein	5	GR383I
35	2004747	2005859	LDBPK_355100	Putative uncharacterized protein	5	GR383I
35	2006915	2007775	LDBPK_355110	Putative uncharacterized protein	5	GR383I
35	2008138	2010021	LDBPK_355120	Biopterin transporter	5	GR383I
35	2012852	2013772	LDBPK_355130	Putative uncharacterized protein	5	GR383I
35	2015795	2016733	LDBPK_355140	Putative uncharacterized protein	5	GR383I
35	2017720	2019534	LDBPK_355150	Putative uncharacterized protein	5	GR383I
35	2021970	2023403	LDBPK_355160	Folate/biopterin transporter	5	GR383I
35	2027399	2028172	LDBPK_355170	Putative uncharacterized protein	5	GR383I
35	2035083	2036477	LDBPK_355180	Putative uncharacterized protein	5	GR383I
35	2037110	2038066	LDBPK_355190	Putative uncharacterized protein	5	GR383I
35	2038724	2039449	LDBPK_355200	tRNA (Guanine-N(7)-)-methyltransferase	5	GR383I
35	2041669	2042478	LDBPK_355210	Putative uncharacterized protein	5	GR383I
35	2045065	2046465	LDBPK_355220	Glycosyl transferase	5	GR383I
35	2047060	2047317	LDBPK_355230	Putative uncharacterized protein	5	GR383I
35	2048329	2049399	LDBPK_355240	Putative uncharacterized protein	5	GR383I
35	2050371	2051138	LDBPK_355250	Putative uncharacterized protein	5	GR383I
35	2051933	2052508	LDBPK_355260	p21 antigen protein	5	GR383I
35	2053563	2054513	LDBPK_355270	Putative uncharacterized protein	5	GR383I
35	2055258	2056382	LDBPK_355280	GTP-binding protein	5	GR383I
35	2056999	2058792	LDBPK_355290	Putative uncharacterized protein	5	GR383I
35	2059377	2060450	LDBPK_355300	Isopentenyl-diphosphate delta-isomerase	5	GR383I
35	2061366	2062406	LDBPK_355310	Putative uncharacterized protein	5	GR383I
35	2063132	2064364	LDBPK_355320	Amino acid permease	5	GR383I
35	2070542	2071720	LDBPK_355330	Protein kinase	5	GR383I
35	2075817	2078507	LDBPK_355340	Putative uncharacterized protein	5	GR383I
35	2079345	2080940	LDBPK_355350	Putative uncharacterized protein	5	GR383I
35	2082345	2084027	LDBPK_355360	Polyadenylate-binding protein 1	5	GR383I
35	2087001	2088989	LDBPK_355370	Putative uncharacterized protein	5	GR383I
35	2091255	2092793	LDBPK_355380	Putative uncharacterized protein	5	GR383I
35	2094752	2095258	LDBPK_355390	Putative uncharacterized protein	5	GR383I
2	69113	70144	LDBPK_020140	Phosphoglycan beta 1	3	GR383II
2	76240	76944	LDBPK_020150	Phosphoglycan beta 1	3	GR383II
2	81476	81679	LDBPK_020160	Phosphoglycan beta 1	3	GR383II
8	338970	339551	LDBPK_080780	Amastin-like protein	1	GR383II
8	340014	340298	LDBPK_080790	Amastin-like protein	1	GR383II
17	57178	59232	LDBPK_170140	Receptor-type adenylate cyclase b (Fragment)	1	GR383II
17	61864	62145	LDBPK_170150	Receptor-type adenylate cyclase b	1	GR383II
22	666638	666850	LDBPK_221550	Putative uncharacterized protein	3	GR383II
28	756654	756995	LDBPK_282040	Putative uncharacterized protein	1	GR383II
28	760309	761703	LDBPK_282050	Zinc transporter	1	GR383II
29	715106	715465	LDBPK_291620	Putative uncharacterized protein (Fragment)	3	GR383II
29	721206	721553	LDBPK_291630	Putative uncharacterized protein	3	GR383II
30	572069	575023	LDBPK_301630	Ferric reductase	4	GR383II
30	578031	580121	LDBPK_301640	Putative uncharacterized protein	4	GR383II
30	581219	581605	LDBPK_301650	Putative uncharacterized protein	4	GR383II
30	582895	583347	LDBPK_301660	Putative uncharacterized protein	4	GR383II
34	728956	729774	LDBPK_341700	Amastin-like surface protein	1	GR383II
35	1895864	1896634	LDBPK_354900	Putative uncharacterized protein	5	GR383II
35	1900105	1900857	LDBPK_354910	Proteasome subunit alpha type	5	GR383II
35	1902480	1903529	LDBPK_354920	Putative uncharacterized protein	5	GR383II
35	1904946	1907948	LDBPK_354930	Putative uncharacterized protein	5	GR383II
35	1909105	1910253	LDBPK_354940	Putative uncharacterized protein	5	GR383II
35	1911880	1912743	LDBPK_354950	RAD51/dmc1 protein	5	GR383II
35	1913753	1914214	LDBPK_354960	Putative uncharacterized protein	5	GR383II
35	1915319	1918045	LDBPK_354970	DNA replication factor	5	GR383II
35	1921377	1923554	LDBPK_354980	Tubulin tyrosine ligase	5	GR383II
35	1924929	1925546	LDBPK_354990	Putative uncharacterized protein	5	GR383II
35	1931319	1934417	LDBPK_355000	Putative uncharacterized protein	5	GR383II
35	1938572	1939096	LDBPK_355010	Putative uncharacterized protein	5	GR383II
35	1940119	1941147	LDBPK_355020	Putative uncharacterized protein	5	GR383II
35	1944580	1945737	LDBPK_355030	Inositol phosphorylceramide synthase	5	GR383II
35	1949491	1950333	LDBPK_355040	Putative uncharacterized protein	5	GR383II
35	1960665	1961444	LDBPK_355050	Putative uncharacterized protein	5	GR383II
35	1963273	1964436	LDBPK_355060	Diacylglycerol kinase-like protein	5	GR383II
35	1965176	1966393	LDBPK_355070	Amino acid permease	5	GR383II
35	1969234	1989111	LDBPK_355080	Putative uncharacterized protein	5	GR383II
35	2002744	2003823	LDBPK_355090	Putative uncharacterized protein	5	GR383II
35	2004747	2005859	LDBPK_355100	Putative uncharacterized protein	5	GR383II
35	2006915	2007775	LDBPK_355110	Putative uncharacterized protein	5	GR383II
35	2008138	2010021	LDBPK_355120	Biopterin transporter	5	GR383II
35	2012852	2013772	LDBPK_355130	Putative uncharacterized protein	5	GR383II
35	2015795	2016733	LDBPK_355140	Putative uncharacterized protein	5	GR383II
35	2017720	2019534	LDBPK_355150	Putative uncharacterized protein	5	GR383II
35	2021970	2023403	LDBPK_355160	Folate/biopterin transporter	5	GR383II
35	2027399	2028172	LDBPK_355170	Putative uncharacterized protein	5	GR383II
35	2035083	2036477	LDBPK_355180	Putative uncharacterized protein	5	GR383II
35	2037110	2038066	LDBPK_355190	Putative uncharacterized protein	5	GR383II
35	2038724	2039449	LDBPK_355200	tRNA (Guanine-N(7)-)-methyltransferase	5	GR383II
35	2041669	2042478	LDBPK_355210	Putative uncharacterized protein	5	GR383II
35	2045065	2046465	LDBPK_355220	Glycosyl transferase	5	GR383II
35	2047060	2047317	LDBPK_355230	Putative uncharacterized protein	5	GR383II
35	2048329	2049399	LDBPK_355240	Putative uncharacterized protein	5	GR383II
35	2050371	2051138	LDBPK_355250	Putative uncharacterized protein	5	GR383II
35	2051933	2052508	LDBPK_355260	p21 antigen protein	5	GR383II
35	2053563	2054513	LDBPK_355270	Putative uncharacterized protein	5	GR383II
35	2055258	2056382	LDBPK_355280	GTP-binding protein	5	GR383II
35	2056999	2058792	LDBPK_355290	Putative uncharacterized protein	5	GR383II
35	2059377	2060450	LDBPK_355300	Isopentenyl-diphosphate delta-isomerase	5	GR383II
35	2061366	2062406	LDBPK_355310	Putative uncharacterized protein	5	GR383II
35	2063132	2064364	LDBPK_355320	Amino acid permease	5	GR383II
35	2070542	2071720	LDBPK_355330	Protein kinase	5	GR383II
35	2075817	2078507	LDBPK_355340	Putative uncharacterized protein	5	GR383II
35	2079345	2080940	LDBPK_355350	Putative uncharacterized protein	5	GR383II
35	2082345	2084027	LDBPK_355360	Polyadenylate-binding protein 1	5	GR383II
35	2087001	2088989	LDBPK_355370	Putative uncharacterized protein	5	GR383II
35	2091255	2092793	LDBPK_355380	Putative uncharacterized protein	5	GR383II
35	2094752	2095258	LDBPK_355390	Putative uncharacterized protein	5	GR383II
2	76240	76944	LDBPK_020150	Phosphoglycan beta 1	3	GR383X
2	81476	81679	LDBPK_020160	Phosphoglycan beta 1	3	GR383X
8	338970	339551	LDBPK_080780	Amastin-like protein	3	GR383X
8	340014	340298	LDBPK_080790	Amastin-like protein	3	GR383X
8	496854	497294	LDBPK_081290	Beta tubulin (Fragment)	4	GR383X
8	500099	501991	LDBPK_081300	Histone deacetylase	4	GR383X
8	503422	503463	LDBPK_081310	Putative uncharacterized protein	4	GR383X
14	250499	251383	LDBPK_140700	Fatty acid elongase	4	GR383X
18	287537	288460	LDBPK_180700	Citrate synthase (Fragment)	3	GR383X
19	231925	233097	LDBPK_190570	Putative uncharacterized protein (Fragment)	3	GR383X
21	661627	662940	LDBPK_211850	Putative uncharacterized protein	3	GR383X
22	555165	555614	LDBPK_221260	Centrin	3	GR383X
22	558326	559210	LDBPK_221270	Aquaporin	3	GR383X
22	560214	560549	LDBPK_221280	Peptidyl-prolyl cis-trans isomerase	3	GR383X
22	666638	666850	LDBPK_221550	Putative uncharacterized protein	3	GR383X
23	96936	98192	LDBPK_230300	Argininosuccinate synthase	4	GR383X
24	161201	161887	LDBPK_240460	Hypothetical predicted transmembrane protein (Fragment)	3	GR383X
27	318748	319674	LDBPK_270780	Putative uncharacterized protein	3	GR383X
28	756654	756995	LDBPK_282040	Putative uncharacterized protein	1	GR383X
28	760309	761703	LDBPK_282050	Zinc transporter	1	GR383X
29	713073	714938	LDBPK_291610	Putative uncharacterized protein	4	GR383X
29	715106	715465	LDBPK_291620	Putative uncharacterized protein (Fragment)	4	GR383X
29	721206	721553	LDBPK_291630	Putative uncharacterized protein	4	GR383X
29	961447	962877	LDBPK_292240	Putative uncharacterized protein	3	GR383X
29	1097019	1097486	LDBPK_292560	Heat shock protein 20	3	GR383X
29	1100676	1100873	LDBPK_292570	60S ribosomal protein L13	3	GR383X
29	1102714	1102899	LDBPK_292580	60S ribosomal protein L13	3	GR383X
30	572069	575023	LDBPK_301630	Ferric reductase	4	GR383X
30	578031	580121	LDBPK_301640	Putative uncharacterized protein	4	GR383X
30	581219	581605	LDBPK_301650	Putative uncharacterized protein	4	GR383X
30	582895	583347	LDBPK_301660	Putative uncharacterized protein	4	GR383X
31	522936	524792	LDBPK_311300	ATP-binding cassette protein subfamily C	3	GR383X
31	865260	866147	LDBPK_311850	Amino acid permease (Fragment)	3	GR383X
31	873599	873946	LDBPK_311860	Amino acid permease (Fragment)	3	GR383X
31	1135273	1137138	LDBPK_312330	Aminopeptidase	3	GR383X
31	1138936	1140324	LDBPK_312340	Putative uncharacterized protein	3	GR383X
31	1143541	1144089	LDBPK_312350	ADP-ribosylation factor	3	GR383X
32	1446816	1447142	LDBPK_323810	3-hydroxyisobutyryl-coenzyme a hydrolase-like protein	3	GR383X
32	1450978	1452027	LDBPK_323820	3-hydroxyisobutyryl-coenzyme a hydrolase-like protein	3	GR383X
32	1453479	1454594	LDBPK_323830	Enoyl-CoA hydratase/isomerase family protein	3	GR383X
34	315785	316738	LDBPK_340720	Putative uncharacterized protein (Fragment)	3	GR383X
34	353914	354366	LDBPK_340840	Serine/threonine-protein phosphatase (Fragment)	3	GR383X
34	358945	359430	LDBPK_340850	Serine/threonine-protein phosphatase (Fragment)	3	GR383X
34	1160118	1160435	LDBPK_342660	Amastin-like surface protein	3	GR383X
35	1895864	1896634	LDBPK_354900	Putative uncharacterized protein	5	GR383X
35	1900105	1900857	LDBPK_354910	Proteasome subunit alpha type	5	GR383X
35	1902480	1903529	LDBPK_354920	Putative uncharacterized protein	5	GR383X
35	1904946	1907948	LDBPK_354930	Putative uncharacterized protein	5	GR383X
35	1909105	1910253	LDBPK_354940	Putative uncharacterized protein	5	GR383X
35	1911880	1912743	LDBPK_354950	RAD51/dmc1 protein	5	GR383X
35	1913753	1914214	LDBPK_354960	Putative uncharacterized protein	5	GR383X
35	1915319	1918045	LDBPK_354970	DNA replication factor	5	GR383X
35	1921377	1923554	LDBPK_354980	Tubulin tyrosine ligase	5	GR383X
35	1924929	1925546	LDBPK_354990	Putative uncharacterized protein	5	GR383X
35	1931319	1934417	LDBPK_355000	Putative uncharacterized protein	5	GR383X
35	1938572	1939096	LDBPK_355010	Putative uncharacterized protein	5	GR383X
35	1940119	1941147	LDBPK_355020	Putative uncharacterized protein	5	GR383X
35	1944580	1945737	LDBPK_355030	Inositol phosphorylceramide synthase	5	GR383X
35	1949491	1950333	LDBPK_355040	Putative uncharacterized protein	5	GR383X
35	1960665	1961444	LDBPK_355050	Putative uncharacterized protein	5	GR383X
35	1963273	1964436	LDBPK_355060	Diacylglycerol kinase-like protein	5	GR383X
35	1965176	1966393	LDBPK_355070	Amino acid permease	5	GR383X
35	1969234	1989111	LDBPK_355080	Putative uncharacterized protein	5	GR383X
35	2002744	2003823	LDBPK_355090	Putative uncharacterized protein	5	GR383X
35	2004747	2005859	LDBPK_355100	Putative uncharacterized protein	5	GR383X
35	2006915	2007775	LDBPK_355110	Putative uncharacterized protein	5	GR383X
35	2008138	2010021	LDBPK_355120	Biopterin transporter	5	GR383X
35	2012852	2013772	LDBPK_355130	Putative uncharacterized protein	5	GR383X
35	2015795	2016733	LDBPK_355140	Putative uncharacterized protein	5	GR383X
35	2017720	2019534	LDBPK_355150	Putative uncharacterized protein	5	GR383X
35	2021970	2023403	LDBPK_355160	Folate/biopterin transporter	5	GR383X
35	2027399	2028172	LDBPK_355170	Putative uncharacterized protein	5	GR383X
35	2035083	2036477	LDBPK_355180	Putative uncharacterized protein	5	GR383X
35	2037110	2038066	LDBPK_355190	Putative uncharacterized protein	5	GR383X
35	2038724	2039449	LDBPK_355200	tRNA (Guanine-N(7)-)-methyltransferase	5	GR383X
35	2041669	2042478	LDBPK_355210	Putative uncharacterized protein	5	GR383X
35	2045065	2046465	LDBPK_355220	Glycosyl transferase	5	GR383X
35	2047060	2047317	LDBPK_355230	Putative uncharacterized protein	5	GR383X
35	2048329	2049399	LDBPK_355240	Putative uncharacterized protein	5	GR383X
35	2050371	2051138	LDBPK_355250	Putative uncharacterized protein	5	GR383X
35	2051933	2052508	LDBPK_355260	p21 antigen protein	5	GR383X
35	2053563	2054513	LDBPK_355270	Putative uncharacterized protein	5	GR383X
35	2055258	2056382	LDBPK_355280	GTP-binding protein	5	GR383X
35	2056999	2058792	LDBPK_355290	Putative uncharacterized protein	5	GR383X
35	2059377	2060450	LDBPK_355300	Isopentenyl-diphosphate delta-isomerase	5	GR383X
35	2061366	2062406	LDBPK_355310	Putative uncharacterized protein	5	GR383X
35	2063132	2064364	LDBPK_355320	Amino acid permease	5	GR383X
35	2070542	2071720	LDBPK_355330	Protein kinase	5	GR383X
35	2075817	2078507	LDBPK_355340	Putative uncharacterized protein	5	GR383X
35	2079345	2080940	LDBPK_355350	Putative uncharacterized protein	5	GR383X
35	2082345	2084027	LDBPK_355360	Polyadenylate-binding protein 1	5	GR383X
35	2087001	2088989	LDBPK_355370	Putative uncharacterized protein	5	GR383X
35	2091255	2092793	LDBPK_355380	Putative uncharacterized protein	5	GR383X
35	2094752	2095258	LDBPK_355390	Putative uncharacterized protein	5	GR383X
36	1571715	1572758	LDBPK_364270	Phosphoglycerate mutase family member 5	3	GR383X
2	69113	70144	LDBPK_020140	Phosphoglycan beta 1	3	GR383XII
2	76240	76944	LDBPK_020150	Phosphoglycan beta 1	3	GR383XII
2	81476	81679	LDBPK_020160	Phosphoglycan beta 1	3	GR383XII
8	338970	339551	LDBPK_080780	Amastin-like protein	1	GR383XII
8	340014	340298	LDBPK_080790	Amastin-like protein	1	GR383XII
17	57178	59232	LDBPK_170140	Receptor-type adenylate cyclase b (Fragment)	1	GR383XII
17	61864	62145	LDBPK_170150	Receptor-type adenylate cyclase b	1	GR383XII
22	666638	666850	LDBPK_221550	Putative uncharacterized protein	3	GR383XII
28	756654	756995	LDBPK_282040	Putative uncharacterized protein	1	GR383XII
28	760309	761703	LDBPK_282050	Zinc transporter	1	GR383XII
29	715106	715465	LDBPK_291620	Putative uncharacterized protein (Fragment)	3	GR383XII
29	721206	721553	LDBPK_291630	Putative uncharacterized protein	3	GR383XII
30	572069	575023	LDBPK_301630	Ferric reductase	4	GR383XII
30	578031	580121	LDBPK_301640	Putative uncharacterized protein	4	GR383XII
30	581219	581605	LDBPK_301650	Putative uncharacterized protein	4	GR383XII
30	582895	583347	LDBPK_301660	Putative uncharacterized protein	4	GR383XII
34	728956	729774	LDBPK_341700	Amastin-like surface protein	1	GR383XII
35	1895864	1896634	LDBPK_354900	Putative uncharacterized protein	5	GR383XII
35	1900105	1900857	LDBPK_354910	Proteasome subunit alpha type	5	GR383XII
35	1902480	1903529	LDBPK_354920	Putative uncharacterized protein	5	GR383XII
35	1904946	1907948	LDBPK_354930	Putative uncharacterized protein	5	GR383XII
35	1909105	1910253	LDBPK_354940	Putative uncharacterized protein	5	GR383XII
35	1911880	1912743	LDBPK_354950	RAD51/dmc1 protein	5	GR383XII
35	1913753	1914214	LDBPK_354960	Putative uncharacterized protein	5	GR383XII
35	1915319	1918045	LDBPK_354970	DNA replication factor	5	GR383XII
35	1921377	1923554	LDBPK_354980	Tubulin tyrosine ligase	5	GR383XII
35	1924929	1925546	LDBPK_354990	Putative uncharacterized protein	5	GR383XII
35	1931319	1934417	LDBPK_355000	Putative uncharacterized protein	5	GR383XII
35	1938572	1939096	LDBPK_355010	Putative uncharacterized protein	5	GR383XII
35	1940119	1941147	LDBPK_355020	Putative uncharacterized protein	5	GR383XII
35	1944580	1945737	LDBPK_355030	Inositol phosphorylceramide synthase	5	GR383XII
35	1949491	1950333	LDBPK_355040	Putative uncharacterized protein	5	GR383XII
35	1960665	1961444	LDBPK_355050	Putative uncharacterized protein	5	GR383XII
35	1963273	1964436	LDBPK_355060	Diacylglycerol kinase-like protein	5	GR383XII
35	1965176	1966393	LDBPK_355070	Amino acid permease	5	GR383XII
35	1969234	1989111	LDBPK_355080	Putative uncharacterized protein	5	GR383XII
35	2002744	2003823	LDBPK_355090	Putative uncharacterized protein	5	GR383XII
35	2004747	2005859	LDBPK_355100	Putative uncharacterized protein	5	GR383XII
35	2006915	2007775	LDBPK_355110	Putative uncharacterized protein	5	GR383XII
35	2008138	2010021	LDBPK_355120	Biopterin transporter	5	GR383XII
35	2012852	2013772	LDBPK_355130	Putative uncharacterized protein	5	GR383XII
35	2015795	2016733	LDBPK_355140	Putative uncharacterized protein	5	GR383XII
35	2017720	2019534	LDBPK_355150	Putative uncharacterized protein	5	GR383XII
35	2021970	2023403	LDBPK_355160	Folate/biopterin transporter	5	GR383XII
35	2027399	2028172	LDBPK_355170	Putative uncharacterized protein	5	GR383XII
35	2035083	2036477	LDBPK_355180	Putative uncharacterized protein	5	GR383XII
35	2037110	2038066	LDBPK_355190	Putative uncharacterized protein	5	GR383XII
35	2038724	2039449	LDBPK_355200	tRNA (Guanine-N(7)-)-methyltransferase	5	GR383XII
35	2041669	2042478	LDBPK_355210	Putative uncharacterized protein	5	GR383XII
35	2045065	2046465	LDBPK_355220	Glycosyl transferase	5	GR383XII
35	2047060	2047317	LDBPK_355230	Putative uncharacterized protein	5	GR383XII
35	2048329	2049399	LDBPK_355240	Putative uncharacterized protein	5	GR383XII
35	2050371	2051138	LDBPK_355250	Putative uncharacterized protein	5	GR383XII
35	2051933	2052508	LDBPK_355260	p21 antigen protein	5	GR383XII
35	2053563	2054513	LDBPK_355270	Putative uncharacterized protein	5	GR383XII
35	2055258	2056382	LDBPK_355280	GTP-binding protein	5	GR383XII
35	2056999	2058792	LDBPK_355290	Putative uncharacterized protein	5	GR383XII
35	2059377	2060450	LDBPK_355300	Isopentenyl-diphosphate delta-isomerase	5	GR383XII
35	2061366	2062406	LDBPK_355310	Putative uncharacterized protein	5	GR383XII
35	2063132	2064364	LDBPK_355320	Amino acid permease	5	GR383XII
35	2070542	2071720	LDBPK_355330	Protein kinase	5	GR383XII
35	2075817	2078507	LDBPK_355340	Putative uncharacterized protein	5	GR383XII
35	2079345	2080940	LDBPK_355350	Putative uncharacterized protein	5	GR383XII
35	2082345	2084027	LDBPK_355360	Polyadenylate-binding protein 1	5	GR383XII
35	2087001	2088989	LDBPK_355370	Putative uncharacterized protein	5	GR383XII
35	2091255	2092793	LDBPK_355380	Putative uncharacterized protein	5	GR383XII
35	2094752	2095258	LDBPK_355390	Putative uncharacterized protein	5	GR383XII
2	69113	70144	LDBPK_020140	Phosphoglycan beta 1	3	GR383XIII
2	76240	76944	LDBPK_020150	Phosphoglycan beta 1	3	GR383XIII
2	81476	81679	LDBPK_020160	Phosphoglycan beta 1	3	GR383XIII
2	89219	90304	LDBPK_020170	Phosphoglycan beta 1	3	GR383XIII
8	338970	339551	LDBPK_080780	Amastin-like protein	3	GR383XIII
8	340014	340298	LDBPK_080790	Amastin-like protein	3	GR383XIII
8	496854	497294	LDBPK_081290	Beta tubulin (Fragment)	4	GR383XIII
8	500099	501991	LDBPK_081300	Histone deacetylase	4	GR383XIII
8	503422	503463	LDBPK_081310	Putative uncharacterized protein	4	GR383XIII
11	568089	568691	LDBPK_111340	Putative uncharacterized protein	3	GR383XIII
11	569510	570820	LDBPK_111350	Putative uncharacterized protein	3	GR383XIII
11	572920	574776	LDBPK_111360	Putative uncharacterized protein	3	GR383XIII
11	576008	577168	LDBPK_111370	Putative uncharacterized protein	3	GR383XIII
14	250499	251383	LDBPK_140700	Fatty acid elongase	4	GR383XIII
18	287537	288460	LDBPK_180700	Citrate synthase (Fragment)	3	GR383XIII
19	231925	233097	LDBPK_190570	Putative uncharacterized protein (Fragment)	3	GR383XIII
19	727135	727818	LDBPK_191690	Putative uncharacterized protein (Fragment)	3	GR383XIII
20	733119	733430	LDBPK_201720	Aminoacylase	3	GR383XIII
20	737115	737282	LDBPK_201730	Aminoacylase	3	GR383XIII
21	661627	662940	LDBPK_211850	Putative uncharacterized protein	3	GR383XIII
23	96936	98192	LDBPK_230300	Argininosuccinate synthase	4	GR383XIII
24	161201	161887	LDBPK_240460	Hypothetical predicted transmembrane protein (Fragment)	3	GR383XIII
27	318748	319674	LDBPK_270780	Putative uncharacterized protein	3	GR383XIII
28	756654	756995	LDBPK_282040	Putative uncharacterized protein	1	GR383XIII
28	760309	761703	LDBPK_282050	Zinc transporter	1	GR383XIII
29	713073	714938	LDBPK_291610	Putative uncharacterized protein	4	GR383XIII
29	715106	715465	LDBPK_291620	Putative uncharacterized protein (Fragment)	4	GR383XIII
29	721206	721553	LDBPK_291630	Putative uncharacterized protein	4	GR383XIII
29	961447	962877	LDBPK_292240	Putative uncharacterized protein	3	GR383XIII
29	1097019	1097486	LDBPK_292560	Heat shock protein 20	3	GR383XIII
29	1100676	1100873	LDBPK_292570	60S ribosomal protein L13	3	GR383XIII
29	1102714	1102899	LDBPK_292580	60S ribosomal protein L13	3	GR383XIII
30	498149	498673	LDBPK_301480	Ama1 protein	3	GR383XIII
30	498977	499222	LDBPK_301490	Ama1 protein	3	GR383XIII
30	572069	575023	LDBPK_301630	Ferric reductase	4	GR383XIII
30	578031	580121	LDBPK_301640	Putative uncharacterized protein	4	GR383XIII
30	581219	581605	LDBPK_301650	Putative uncharacterized protein	4	GR383XIII
30	582895	583347	LDBPK_301660	Putative uncharacterized protein	4	GR383XIII
31	522936	524792	LDBPK_311300	ATP-binding cassette protein subfamily C	3	GR383XIII
31	865260	866147	LDBPK_311850	Amino acid permease (Fragment)	3	GR383XIII
31	873599	873946	LDBPK_311860	Amino acid permease (Fragment)	3	GR383XIII
32	1446816	1447142	LDBPK_323810	3-hydroxyisobutyryl-coenzyme a hydrolase-like protein	3	GR383XIII
32	1450978	1452027	LDBPK_323820	3-hydroxyisobutyryl-coenzyme a hydrolase-like protein	3	GR383XIII
32	1453479	1454594	LDBPK_323830	Enoyl-CoA hydratase/isomerase family protein	3	GR383XIII
34	353914	354366	LDBPK_340840	Serine/threonine-protein phosphatase (Fragment)	3	GR383XIII
34	358945	359430	LDBPK_340850	Serine/threonine-protein phosphatase (Fragment)	3	GR383XIII
34	1160118	1160435	LDBPK_342660	Amastin-like surface protein	3	GR383XIII
35	1895864	1896634	LDBPK_354900	Putative uncharacterized protein	5	GR383XIII
35	1900105	1900857	LDBPK_354910	Proteasome subunit alpha type	5	GR383XIII
35	1902480	1903529	LDBPK_354920	Putative uncharacterized protein	5	GR383XIII
35	1904946	1907948	LDBPK_354930	Putative uncharacterized protein	5	GR383XIII
35	1909105	1910253	LDBPK_354940	Putative uncharacterized protein	5	GR383XIII
35	1911880	1912743	LDBPK_354950	RAD51/dmc1 protein	5	GR383XIII
35	1913753	1914214	LDBPK_354960	Putative uncharacterized protein	5	GR383XIII
35	1915319	1918045	LDBPK_354970	DNA replication factor	5	GR383XIII
35	1921377	1923554	LDBPK_354980	Tubulin tyrosine ligase	5	GR383XIII
35	1924929	1925546	LDBPK_354990	Putative uncharacterized protein	5	GR383XIII
35	1931319	1934417	LDBPK_355000	Putative uncharacterized protein	5	GR383XIII
35	1938572	1939096	LDBPK_355010	Putative uncharacterized protein	5	GR383XIII
35	1940119	1941147	LDBPK_355020	Putative uncharacterized protein	5	GR383XIII
35	1944580	1945737	LDBPK_355030	Inositol phosphorylceramide synthase	5	GR383XIII
35	1949491	1950333	LDBPK_355040	Putative uncharacterized protein	5	GR383XIII
35	1960665	1961444	LDBPK_355050	Putative uncharacterized protein	5	GR383XIII
35	1963273	1964436	LDBPK_355060	Diacylglycerol kinase-like protein	5	GR383XIII
35	1965176	1966393	LDBPK_355070	Amino acid permease	5	GR383XIII
35	1969234	1989111	LDBPK_355080	Putative uncharacterized protein	5	GR383XIII
35	2002744	2003823	LDBPK_355090	Putative uncharacterized protein	5	GR383XIII
35	2004747	2005859	LDBPK_355100	Putative uncharacterized protein	5	GR383XIII
35	2006915	2007775	LDBPK_355110	Putative uncharacterized protein	5	GR383XIII
35	2008138	2010021	LDBPK_355120	Biopterin transporter	5	GR383XIII
35	2012852	2013772	LDBPK_355130	Putative uncharacterized protein	5	GR383XIII
35	2015795	2016733	LDBPK_355140	Putative uncharacterized protein	5	GR383XIII
35	2017720	2019534	LDBPK_355150	Putative uncharacterized protein	5	GR383XIII
35	2021970	2023403	LDBPK_355160	Folate/biopterin transporter	5	GR383XIII
35	2027399	2028172	LDBPK_355170	Putative uncharacterized protein	5	GR383XIII
35	2035083	2036477	LDBPK_355180	Putative uncharacterized protein	5	GR383XIII
35	2037110	2038066	LDBPK_355190	Putative uncharacterized protein	5	GR383XIII
35	2038724	2039449	LDBPK_355200	tRNA (Guanine-N(7)-)-methyltransferase	5	GR383XIII
35	2041669	2042478	LDBPK_355210	Putative uncharacterized protein	5	GR383XIII
35	2045065	2046465	LDBPK_355220	Glycosyl transferase	5	GR383XIII
35	2047060	2047317	LDBPK_355230	Putative uncharacterized protein	5	GR383XIII
35	2048329	2049399	LDBPK_355240	Putative uncharacterized protein	5	GR383XIII
35	2050371	2051138	LDBPK_355250	Putative uncharacterized protein	5	GR383XIII
35	2051933	2052508	LDBPK_355260	p21 antigen protein	5	GR383XIII
35	2053563	2054513	LDBPK_355270	Putative uncharacterized protein	5	GR383XIII
35	2055258	2056382	LDBPK_355280	GTP-binding protein	5	GR383XIII
35	2056999	2058792	LDBPK_355290	Putative uncharacterized protein	5	GR383XIII
35	2059377	2060450	LDBPK_355300	Isopentenyl-diphosphate delta-isomerase	5	GR383XIII
35	2061366	2062406	LDBPK_355310	Putative uncharacterized protein	5	GR383XIII
35	2063132	2064364	LDBPK_355320	Amino acid permease	5	GR383XIII
35	2070542	2071720	LDBPK_355330	Protein kinase	5	GR383XIII
35	2075817	2078507	LDBPK_355340	Putative uncharacterized protein	5	GR383XIII
35	2079345	2080940	LDBPK_355350	Putative uncharacterized protein	5	GR383XIII
35	2082345	2084027	LDBPK_355360	Polyadenylate-binding protein 1	5	GR383XIII
35	2087001	2088989	LDBPK_355370	Putative uncharacterized protein	5	GR383XIII
35	2091255	2092793	LDBPK_355380	Putative uncharacterized protein	5	GR383XIII
35	2094752	2095258	LDBPK_355390	Putative uncharacterized protein	5	GR383XIII
36	1571715	1572758	LDBPK_364270	Phosphoglycerate mutase family member 5	3	GR383XIII
2	69113	70144	LDBPK_020140	Phosphoglycan beta 1	5	LDS373BM
4	51206	52510	LDBPK_040150	Putative uncharacterized protein	3	LDS373BM
4	53006	54583	LDBPK_040160	Putative uncharacterized protein	3	LDS373BM
4	57483	58529	LDBPK_040170	Surface antigen-like protein (Fragment)	3	LDS373BM
9	447763	448602	LDBPK_091130	Eukaryotic translation initiation factor 2 subunit	3	LDS373BM
9	452959	453159	LDBPK_091140	Translation initiation factor EIF-2B gamma subunit	3	LDS373BM
9	454006	454773	LDBPK_091160	Putative uncharacterized protein	3	LDS373BM
10	162754	163668	LDBPK_100390	Folate/biopterin transporter	1	LDS373BM
10	170745	171935	LDBPK_100400	Folate/biopterin transporter	1	LDS373BM
10	178404	179465	LDBPK_100410	Folate/biopterin transporter	1	LDS373BM
11	501882	502019	LDBPK_111220	ABC transporter-like protein (Fragment)	1	LDS373BM
11	505709	509374	LDBPK_111230	ATP-binding cassette protein subfamily A	1	LDS373BM
12	410501	411088	LDBPK_120667	Putative uncharacterized protein LDBPK_120667	3	LDS373BM
14	132416	132526	LDBPK_140390	Putative uncharacterized protein	3	LDS373BM
14	135623	136555	LDBPK_140400	Putative uncharacterized protein	3	LDS373BM
19	648080	648925	LDBPK_191520	Eukaryotic translation initiation factor-like protein	3	LDS373BM
19	649707	650051	LDBPK_191530	Putative uncharacterized protein	3	LDS373BM
19	651347	652312	LDBPK_191540	Putative uncharacterized protein	3	LDS373BM
24	116832	117299	LDBPK_240360	CMP-sialic acid transporter	8	LDS373BM
27	798359	799840	LDBPK_271940	D-lactate dehydrogenase-like protein	1	LDS373BM
27	803591	804793	LDBPK_271950	Branched-chain amino acid aminotransferase	1	LDS373BM
28	525151	526179	LDBPK_281500	Putative uncharacterized protein	3	LDS373BM
33	615773	618331	LDBPK_331580	Putative uncharacterized protein	3	LDS373BM
33	619863	621761	LDBPK_331590	Putative uncharacterized protein	3	LDS373BM
33	623107	623718	LDBPK_331600	Putative uncharacterized protein	3	LDS373BM
33	626323	626868	LDBPK_331610	Putative uncharacterized protein	3	LDS373BM
33	627934	628530	LDBPK_331620	Putative uncharacterized protein	3	LDS373BM
33	629299	629961	LDBPK_331630	Elongation factor 1-gamma	3	LDS373BM
34	740366	740641	LDBPK_341720	Amastin-like surface protein	1	LDS373BM
34	743270	743830	LDBPK_341730	Amastin-like surface protein	1	LDS373BM
35	1561280	1562050	LDBPK_353980	Putative uncharacterized protein	3	LDS373BM
35	1563100	1564914	LDBPK_353990	Putative uncharacterized protein	3	LDS373BM
35	1566458	1573741	LDBPK_354000	PRP8 protein homologue	3	LDS373BM
35	1581387	1583507	LDBPK_354020	Putative uncharacterized protein	3	LDS373BM
35	1590925	1593300	LDBPK_354030	Putative uncharacterized protein	3	LDS373BM
35	1601714	1602424	LDBPK_354040	Putative uncharacterized protein	3	LDS373BM
35	1604839	1608870	LDBPK_354050	Protein kinase	3	LDS373BM
35	1610556	1611053	LDBPK_354060	Protein kinase A catalytic subunit isoform 1 (Fragment)	3	LDS373BM
35	1620840	1622912	LDBPK_354080	ATP-dependent RNA helicase	3	LDS373BM
35	1624117	1625277	LDBPK_354090	Putative uncharacterized protein	3	LDS373BM
35	1626387	1626734	LDBPK_354100	Putative uncharacterized protein	3	LDS373BM
35	1628274	1632131	LDBPK_354110	Protein kinase	3	LDS373BM
35	1633114	1633953	LDBPK_354120	Putative uncharacterized protein	3	LDS373BM
35	1635209	1636225	LDBPK_354130	Putative uncharacterized protein	3	LDS373BM
35	1637495	1640815	LDBPK_354140	Putative uncharacterized protein	3	LDS373BM
35	1641838	1642092	LDBPK_354150	Putative uncharacterized protein	3	LDS373BM
35	1643506	1644774	LDBPK_354160	Putative uncharacterized protein	3	LDS373BM
35	1645611	1646231	LDBPK_354170	Putative uncharacterized protein	3	LDS373BM
35	1647088	1650282	LDBPK_354180	Putative uncharacterized protein	3	LDS373BM
35	1651484	1653241	LDBPK_354190	Putative uncharacterized protein	3	LDS373BM
35	1655740	1657497	LDBPK_354200	Poly(A) binding protein	3	LDS373BM
35	1664160	1665080	LDBPK_354210	Putative uncharacterized protein	3	LDS373BM
35	1667131	1669071	LDBPK_354220	Elongation factor 1-alpha	3	LDS373BM
35	1670847	1672325	LDBPK_354230	Putative uncharacterized protein	3	LDS373BM
35	1673150	1674244	LDBPK_354240	Putative uncharacterized protein	3	LDS373BM
35	1675100	1676881	LDBPK_354250	Putative uncharacterized protein	3	LDS373BM
35	1677701	1678393	LDBPK_354260	Putative uncharacterized protein	3	LDS373BM
35	1683752	1684372	LDBPK_354270	Putative uncharacterized protein	3	LDS373BM
35	1690163	1692391	LDBPK_354280	Putative uncharacterized protein	3	LDS373BM
35	1695386	1697185	LDBPK_354290	Putative uncharacterized protein	3	LDS373BM
35	1704926	1707946	LDBPK_354300	Putative uncharacterized protein	3	LDS373BM
35	1710104	1711000	LDBPK_354310	Putative uncharacterized protein	3	LDS373BM
35	1720226	1721191	LDBPK_354320	3-demethylubiquinone-9 3-methyltransferase	3	LDS373BM
35	1722335	1723468	LDBPK_354330	Putative uncharacterized protein	3	LDS373BM
35	1724992	1725501	LDBPK_354340	Putative uncharacterized protein	3	LDS373BM
35	1727396	1729840	LDBPK_354350	Putative uncharacterized protein	3	LDS373BM
35	1733866	1734843	LDBPK_354360	Putative uncharacterized protein	3	LDS373BM
35	1743390	1744139	LDBPK_354370	Putative uncharacterized protein	3	LDS373BM
35	1745051	1745476	LDBPK_354380	Putative uncharacterized protein	3	LDS373BM
35	1746257	1747906	LDBPK_354390	Putative uncharacterized protein	3	LDS373BM
35	1748449	1750356	LDBPK_354400	Putative uncharacterized protein	3	LDS373BM
35	1751776	1752804	LDBPK_354410	Putative uncharacterized protein	3	LDS373BM
35	1753922	1757797	LDBPK_354420	Putative uncharacterized protein	3	LDS373BM
35	1759388	1766059	LDBPK_354430	DNA polymerase	3	LDS373BM
35	1767080	1767424	LDBPK_354440	Putative uncharacterized protein	3	LDS373BM
35	1768201	1768473	LDBPK_354450	Putative uncharacterized protein (Fragment)	3	LDS373BM
35	1771356	1772591	LDBPK_354460	Putative uncharacterized protein	3	LDS373BM
35	1773603	1774223	LDBPK_354470	Putative uncharacterized protein	3	LDS373BM
35	1776731	1778284	LDBPK_354480	Amino acid permease	3	LDS373BM
35	1778841	1779386	LDBPK_354490	Mitochondrial phosphate transporter	3	LDS373BM
35	1787720	1788007	LDBPK_354510	Putative uncharacterized protein	3	LDS373BM
35	1793580	1793855	LDBPK_354520	Putative uncharacterized protein	3	LDS373BM
35	1799830	1800060	LDBPK_354530	Sm-f snRNP core complex protein	3	LDS373BM
35	1801086	1801685	LDBPK_354540	Putative uncharacterized protein	3	LDS373BM
35	1803076	1803648	LDBPK_354550	Putative uncharacterized protein	3	LDS373BM
35	1805218	1809669	LDBPK_354560	Putative uncharacterized protein	3	LDS373BM
35	1811022	1811270	LDBPK_354570	Anaphase promoting complex subunit protein	3	LDS373BM
35	1811978	1812673	LDBPK_354580	Putative uncharacterized protein	3	LDS373BM
35	1813805	1814341	LDBPK_354590	Putative uncharacterized protein	3	LDS373BM
35	1815408	1817564	LDBPK_354600	Putative uncharacterized protein	3	LDS373BM
35	1819076	1819453	LDBPK_354610	Putative uncharacterized protein	3	LDS373BM
35	1823822	1828261	LDBPK_354620	Putative uncharacterized protein	3	LDS373BM
35	1829488	1830840	LDBPK_354630	Putative uncharacterized protein	3	LDS373BM
35	1831461	1831877	LDBPK_354640	Putative uncharacterized protein	3	LDS373BM
35	1832435	1834111	LDBPK_354650	Putative uncharacterized protein	3	LDS373BM
35	1834841	1835899	LDBPK_354660	Phosphatidylserine decarboxylase	3	LDS373BM
35	1836821	1838359	LDBPK_354670	Putative uncharacterized protein	3	LDS373BM
35	1839372	1840235	LDBPK_354680	Putative uncharacterized protein	3	LDS373BM
35	1840898	1841764	LDBPK_354690	Protein kinase	3	LDS373BM
35	1844014	1845489	LDBPK_354700	Putative uncharacterized protein	3	LDS373BM
35	1846948	1847292	LDBPK_354710	Putative uncharacterized protein	3	LDS373BM
35	1848905	1850002	LDBPK_354720	Protein phosphatase	3	LDS373BM
35	1851875	1853167	LDBPK_354730	Small nuclear RNA gene activation protein (SNAP) 50	3	LDS373BM
35	1854057	1855826	LDBPK_354740	Katanin	3	LDS373BM
35	1857600	1857902	LDBPK_354750	Putative uncharacterized protein	3	LDS373BM
35	1859063	1860007	LDBPK_354760	Putative uncharacterized protein	3	LDS373BM
35	1860927	1862369	LDBPK_354770	MCAK-like kinesin	3	LDS373BM
35	1863297	1865471	LDBPK_354780	Putative uncharacterized protein	3	LDS373BM
35	1866554	1866877	LDBPK_354790	Glycine cleavage system H protein	3	LDS373BM
35	1868623	1869348	LDBPK_354800	Putative uncharacterized protein	3	LDS373BM
35	1870100	1871149	LDBPK_354810	Glyceraldehyde-3-phosphate dehydrogenase-like protein	3	LDS373BM
35	1872431	1872877	LDBPK_354820	Putative uncharacterized protein	3	LDS373BM
35	1874676	1875740	LDBPK_354830	Peptidyl-prolyl cis-trans isomerase (Cyclophilin-40)	3	LDS373BM
35	1877371	1877859	LDBPK_354840	Putative uncharacterized protein	3	LDS373BM
35	1878580	1879242	LDBPK_354850	Putative uncharacterized protein	3	LDS373BM
35	1881075	1885493	LDBPK_354860	AMP deaminase	3	LDS373BM
35	1886754	1887854	LDBPK_354870	Putative uncharacterized protein	3	LDS373BM
35	1890349	1891356	LDBPK_354880	Putative uncharacterized protein	3	LDS373BM
35	1893835	1895004	LDBPK_354890	Putative uncharacterized protein	3	LDS373BM
35	1895864	1896634	LDBPK_354900	Putative uncharacterized protein	3	LDS373BM
35	1900105	1900857	LDBPK_354910	Proteasome subunit alpha type	3	LDS373BM
35	1902480	1903529	LDBPK_354920	Putative uncharacterized protein	3	LDS373BM
35	1904946	1907948	LDBPK_354930	Putative uncharacterized protein	3	LDS373BM
35	1909105	1910253	LDBPK_354940	Putative uncharacterized protein	3	LDS373BM
35	1911880	1912743	LDBPK_354950	RAD51/dmc1 protein	3	LDS373BM
35	1913753	1914214	LDBPK_354960	Putative uncharacterized protein	3	LDS373BM
35	1915319	1918045	LDBPK_354970	DNA replication factor	3	LDS373BM
35	1921377	1923554	LDBPK_354980	Tubulin tyrosine ligase	3	LDS373BM
35	1924929	1925546	LDBPK_354990	Putative uncharacterized protein	3	LDS373BM
35	1931319	1934417	LDBPK_355000	Putative uncharacterized protein	3	LDS373BM
35	1938572	1939096	LDBPK_355010	Putative uncharacterized protein	3	LDS373BM
35	1940119	1941147	LDBPK_355020	Putative uncharacterized protein	3	LDS373BM
35	1944580	1945737	LDBPK_355030	Inositol phosphorylceramide synthase	3	LDS373BM
35	1949491	1950333	LDBPK_355040	Putative uncharacterized protein	3	LDS373BM
35	1960665	1961444	LDBPK_355050	Putative uncharacterized protein	3	LDS373BM
35	1963273	1964436	LDBPK_355060	Diacylglycerol kinase-like protein	3	LDS373BM
35	1965176	1966393	LDBPK_355070	Amino acid permease	3	LDS373BM
35	2002744	2003823	LDBPK_355090	Putative uncharacterized protein	3	LDS373BM
35	2004747	2005859	LDBPK_355100	Putative uncharacterized protein	3	LDS373BM
35	2006915	2007775	LDBPK_355110	Putative uncharacterized protein	3	LDS373BM
35	2008138	2010021	LDBPK_355120	Biopterin transporter	3	LDS373BM
35	2012852	2013772	LDBPK_355130	Putative uncharacterized protein	3	LDS373BM
35	2015795	2016733	LDBPK_355140	Putative uncharacterized protein	3	LDS373BM
35	2017720	2019534	LDBPK_355150	Putative uncharacterized protein	3	LDS373BM
35	2021970	2023403	LDBPK_355160	Folate/biopterin transporter	3	LDS373BM
35	2027399	2028172	LDBPK_355170	Putative uncharacterized protein	3	LDS373BM
35	2035083	2036477	LDBPK_355180	Putative uncharacterized protein	3	LDS373BM
35	2037110	2038066	LDBPK_355190	Putative uncharacterized protein	3	LDS373BM
35	2038724	2039449	LDBPK_355200	tRNA (Guanine-N(7)-)-methyltransferase	3	LDS373BM
35	2041669	2042478	LDBPK_355210	Putative uncharacterized protein	3	LDS373BM
35	2045065	2046465	LDBPK_355220	Glycosyl transferase	3	LDS373BM
35	2047060	2047317	LDBPK_355230	Putative uncharacterized protein	3	LDS373BM
35	2048329	2049399	LDBPK_355240	Putative uncharacterized protein	3	LDS373BM
35	2050371	2051138	LDBPK_355250	Putative uncharacterized protein	3	LDS373BM
35	2051933	2052508	LDBPK_355260	p21 antigen protein	3	LDS373BM
35	2053563	2054513	LDBPK_355270	Putative uncharacterized protein	3	LDS373BM
35	2055258	2056382	LDBPK_355280	GTP-binding protein	3	LDS373BM
35	2056999	2058792	LDBPK_355290	Putative uncharacterized protein	3	LDS373BM
35	2059377	2060450	LDBPK_355300	Isopentenyl-diphosphate delta-isomerase	3	LDS373BM
35	2061366	2062406	LDBPK_355310	Putative uncharacterized protein	3	LDS373BM
35	2063132	2064364	LDBPK_355320	Amino acid permease	3	LDS373BM
35	2070542	2071720	LDBPK_355330	Protein kinase	3	LDS373BM
35	2075817	2078507	LDBPK_355340	Putative uncharacterized protein	3	LDS373BM
35	2079345	2080940	LDBPK_355350	Putative uncharacterized protein	3	LDS373BM
35	2082345	2084027	LDBPK_355360	Polyadenylate-binding protein 1	3	LDS373BM
35	2087001	2088989	LDBPK_355370	Putative uncharacterized protein	3	LDS373BM
35	2091255	2092793	LDBPK_355380	Putative uncharacterized protein	3	LDS373BM
36	1571715	1572758	LDBPK_364270	Phosphoglycerate mutase family member 5	1	LDS373BM
36	2541722	2542810	LDBPK_366770	Histidine secretory acid phosphatase	0	LDS373BM
36	2543534	2544511	LDBPK_366780	Ubiquitin fusion degradation protein	0	LDS373BM
2	69113	70144	LDBPK_020140	Phosphoglycan beta 1	3	LDS373SP
2	76240	76944	LDBPK_020150	Phosphoglycan beta 1	3	LDS373SP
2	81476	81679	LDBPK_020160	Phosphoglycan beta 1	3	LDS373SP
14	250499	251383	LDBPK_140700	Fatty acid elongase	3	LDS373SP
28	756654	756995	LDBPK_282040	Putative uncharacterized protein	1	LDS373SP
28	760309	761703	LDBPK_282050	Zinc transporter	1	LDS373SP
29	713073	714938	LDBPK_291610	Putative uncharacterized protein	4	LDS373SP
29	715106	715465	LDBPK_291620	Putative uncharacterized protein (Fragment)	4	LDS373SP
29	721206	721553	LDBPK_291630	Putative uncharacterized protein	4	LDS373SP
30	572069	575023	LDBPK_301630	Ferric reductase	4	LDS373SP
30	578031	580121	LDBPK_301640	Putative uncharacterized protein	4	LDS373SP
30	581219	581605	LDBPK_301650	Putative uncharacterized protein	4	LDS373SP
30	582895	583347	LDBPK_301660	Putative uncharacterized protein	4	LDS373SP
31	670326	670781	LDBPK_311470	Putative uncharacterized protein	3	LDS373SP
32	1446816	1447142	LDBPK_323810	3-hydroxyisobutyryl-coenzyme a hydrolase-like protein	3	LDS373SP
32	1450978	1452027	LDBPK_323820	3-hydroxyisobutyryl-coenzyme a hydrolase-like protein	3	LDS373SP
32	1453479	1454594	LDBPK_323830	Enoyl-CoA hydratase/isomerase family protein	3	LDS373SP
36	2526888	2527169	LDBPK_366740	Tartrate-sensitive acid phosphatase acp-3.2	3	LDS373SP
36	2528652	2530061	LDBPK_366750	Putative uncharacterized protein	3	LDS373SP
36	2531707	2532783	LDBPK_366760	Mitogen activated protein kinase homologue	3	LDS373SP
2	89219	90304	LDBPK_020170	Phosphoglycan beta 1	1	LEMS3570
4	405703	406773	LDBPK_041050	Acyltransferase-like protein	3	LEMS3570
4	407935	409392	LDBPK_041060	Putative uncharacterized protein	3	LEMS3570
10	162754	163668	LDBPK_100390	Folate/biopterin transporter	4	LEMS3570
10	170745	171935	LDBPK_100400	Folate/biopterin transporter	4	LEMS3570
10	178404	179465	LDBPK_100410	Folate/biopterin transporter	4	LEMS3570
20	701458	703284	LDBPK_201600	Putative uncharacterized protein	4	LEMS3570
20	704275	704916	LDBPK_201610	Phosphatase-like protein	4	LEMS3570
20	708283	709494	LDBPK_201630	Putative uncharacterized protein	4	LEMS3570
20	710391	711341	LDBPK_201640	Ribosome biogenesis protein	4	LEMS3570
20	712213	716052	LDBPK_201650	Separin	4	LEMS3570
20	717271	718119	LDBPK_201660	Soluble n-ethylmaleimide sensitive factor	4	LEMS3570
20	719032	719856	LDBPK_201670	Putative uncharacterized protein	4	LEMS3570
20	720460	722271	LDBPK_201680	Putative uncharacterized protein	4	LEMS3570
20	722999	723736	LDBPK_201690	Putative uncharacterized protein	4	LEMS3570
20	724952	726208	LDBPK_201700	Mitochondrial RNA ligase 2	4	LEMS3570
20	726932	727834	LDBPK_201710	Putative uncharacterized protein	4	LEMS3570
29	713073	714938	LDBPK_291610	Putative uncharacterized protein	4	LEMS3570
29	715106	715465	LDBPK_291620	Putative uncharacterized protein (Fragment)	4	LEMS3570
29	721206	721553	LDBPK_291630	Putative uncharacterized protein	4	LEMS3570
30	572069	575023	LDBPK_301630	Ferric reductase	4	LEMS3570
30	578031	580121	LDBPK_301640	Putative uncharacterized protein	4	LEMS3570
30	581219	581605	LDBPK_301650	Putative uncharacterized protein	4	LEMS3570
30	582895	583347	LDBPK_301660	Putative uncharacterized protein	4	LEMS3570
31	1135273	1137138	LDBPK_312330	Aminopeptidase	3	LEMS3570
31	1138936	1140324	LDBPK_312340	Putative uncharacterized protein	3	LEMS3570
31	1143541	1144089	LDBPK_312350	ADP-ribosylation factor	3	LEMS3570
33	1380390	1380647	LDBPK_333230	Putative uncharacterized protein (Fragment)	1	LEMS3570
34	724932	725564	LDBPK_341690	Amastin-like surface protein	1	LEMS3570
34	728956	729774	LDBPK_341700	Amastin-like surface protein	1	LEMS3570
34	1160118	1160435	LDBPK_342660	Amastin-like surface protein	3	LEMS3570
